# Supplementary material for: Photo-induced glycosylation using reusable organophotoacids
Source: Royal Society of Chemistry journal article supplement (doi:10.1039/c4cc04753b), 2014-01-01
Supplement: c4cc04753b1.pdf [file c4cc04753b1.pdf]

## SUPPLEMENTARY INFORMATION

# Photo-Induced Glycosylation Using Reusable Organophotoacids

Ryosuke Iwata, Kanjiro Uda, Daisuke Takahashi and Kazunobu Toshima\*

*Department of Applied Chemistry, Faculty of Science and Technology, Keio University,  
3-14-1 Hiyoshi, Kohoku-ku, Yokohama 223-8522, Japan*

| Page      | Contents                                                              |
|-----------|-----------------------------------------------------------------------|
| S2 . . .  | General experimental methods                                          |
| S2 . . .  | General procedure for glycosylations                                  |
| S3 . . .  | Characterization of glycosides <b>9</b> , <b>17-21</b> , <b>25-27</b> |
| S11 . . . | References                                                            |
| S12 . . . | <sup>1</sup> H and <sup>13</sup> C NMR spectra                        |

### General experimental methods

Melting points were determined on a micro hot-stage (Yanako MP-S3). Optical rotations were measured on a JASCO P-2200 polarimeter.  $^1\text{H}$  and  $^{13}\text{C}$  NMR spectra were recorded on a JEOL ECA-500 (500 MHz) spectrometer.  $^1\text{H}$  NMR data are reported as follows; chemical shift in parts per million (ppm) downfield or upfield from tetramethylsilane ( $\delta$  0.00),  $\text{CDCl}_3$  ( $\delta$  7.26) or acetone- $d_6$  ( $\delta$  2.05) integration, multiplicity (br = broad, s = singlet, d = doublet, t = triplet and m = multiplet) and coupling constants (Hz).  $^{13}\text{C}$  chemical shifts are reported in ppm downfield or upfield from  $\text{CDCl}_3$  ( $\delta$  77.00) or acetone- $d_6$  ( $\delta$  29.8). For  $^1\text{H}$  NMR analysis, prime number was used for assigning number to sugar carbon. ESI-TOF Mass spectra were measured on a Waters LCT premier XE. Silica gel TLC and column chromatography were performed on Merck TLC 60F-254 (0.25 mm) and Silica Gel 60 N (spherical, neutral, 40-50  $\mu\text{m}$ ) (Kanto Chemical Co., Inc.), respectively.

### General procedure for glycosylations by using organophotoacids

To a stirred solution of glycosyl donor (0.1 mmol) and glycosyl acceptor (0.2~0.3 mmol) in  $\text{Et}_2\text{O}$  (0.5 M) was added organophotoacid **2** (0.03 mmol) or **5** (0.01 mmol). After stirring for 4 h under the photoirradiation using a UV lamp (365 nm, 12  $\text{mW}/\text{cm}^2$ ), the mixture was concentrated in vacuo. The purification of the residue by flash column chromatography gave the corresponding glycoside, and **2** or **5** was recovered.

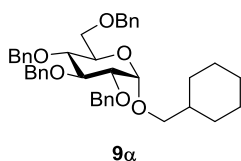

**Cyclohexylmethyl 2,3,4,6-tetra-*O*-benzyl- $\alpha$ -D-glucopyranoside (9 $\alpha$ )<sup>1</sup>:** Colorless syrup;  $R_f$  0.35 (4/1 *n*-hexane/EtOAc);  $[\alpha]_D^{27} +41.1^\circ$  (*c* 0.99, CHCl<sub>3</sub>); <sup>1</sup>H NMR (500 MHz, CDCl<sub>3</sub>)  $\delta$  0.85-1.00 (2H, m), 1.09-1.33 (3H, m), 1.60-1.88 (6H, m), 3.20 (1H, dd,  $J = 9.5$  and 6.0 Hz, OCH<sub>2</sub>), 3.42 (1H, dd,  $J = 9.5$  and 7.5 Hz, OCH<sub>2</sub>), 3.55 (1H, dd,  $J = 9.5$  and 3.5 Hz, H-2), 3.58-3.82 (4H, m), 3.97 (1H, dd,  $J = 9.5$  and 9.5 Hz, H-3), 4.47 and 4.61 (2H, ABq,  $J = 12.5$  Hz, ArCH<sub>2</sub>), 4.47 and 4.83 (2H, ABq,  $J = 11.0$  Hz, ArCH<sub>2</sub>), 4.64 and 4.76 (2H, ABq,  $J = 12.0$  Hz, ArCH<sub>2</sub>), 4.73 (1H, d,  $J = 3.5$  Hz, H-1), 4.81 and 4.99 (2H, ABq,  $J = 10.5$  Hz, ArCH<sub>2</sub>), 7.11-7.16 (2H, m, ArH), 7.22-7.40 (18H, m, ArH); <sup>13</sup>C NMR (500 MHz, CDCl<sub>3</sub>)  $\delta$  25.7, 25.8, 26.6, 30.0 $\times$ 2, 37.6, 68.5, 70.0, 73.0, 73.4, 73.9, 75.1, 75.6, 77.8, 80.3, 82.1, 97.1, 127.6, 127.7 $\times$ 2, 127.9 $\times$ 2, 128.0, 128.3, 128.4 $\times$ 2, 138.0, 138.3, 138.4, 139.0; HRMS (ESI-TOF)  $m/z$  659.3329 (659.3349 calcd for C<sub>41</sub>H<sub>48</sub>O<sub>6</sub>Na [M+Na]<sup>+</sup>).

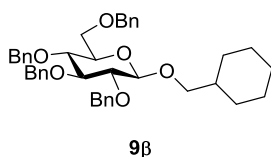

**Cyclohexylmethyl 2,3,4,6-tetra-*O*-benzyl- $\beta$ -D-glucopyranoside (9 $\beta$ )<sup>1</sup>:** White solid;  $R_f$  0.40 (4/1 *n*-hexane/EtOAc);  $[\alpha]_D^{27} +4.2^\circ$  (*c* 0.99, CHCl<sub>3</sub>); mp 98.0-99.0 °C; <sup>1</sup>H NMR (500 MHz, CDCl<sub>3</sub>)  $\delta$  0.90-1.06 (2H, m), 1.08-1.34 (3H, m), 1.58-1.92 (6H, m), 3.32 (1H, dd,  $J = 9.5$  and 7.0 Hz, OCH<sub>2</sub>), 3.40-3.49 (2H, m), 3.53-3.77 (4H, m), 3.79 (1H, dd,  $J = 9.5$  and 6.0 Hz, OCH<sub>2</sub>), 4.37 (1H, d,  $J = 7.5$  Hz, H-1), 4.52 and 4.81 (2H, ABq,  $J = 11.0$  Hz, ArCH<sub>2</sub>), 4.56 and 4.62 (2H, ABq,  $J = 12.0$  Hz, ArCH<sub>2</sub>), 4.71 and 4.96 (2H, ABq,  $J = 11.0$  Hz, ArCH<sub>2</sub>), 4.78 and 4.92 (2H, ABq,  $J = 10.5$  Hz, ArCH<sub>2</sub>), 7.13-7.18 (2H, m, ArH), 7.22-7.38 (18H, m, ArH); <sup>13</sup>C NMR (500 MHz, CDCl<sub>3</sub>)  $\delta$  25.8 $\times$ 2, 26.5, 29.9, 30.1, 38.1, 69.0, 73.4, 74.8, 74.9, 75.0, 75.7 $\times$ 2, 78.0, 82.3, 84.7, 103.8, 127.6, 127.7, 127.8, 128.1, 128.2, 128.3, 128.4, 138.1, 138.2, 138.5, 138.6; HRMS (ESI-TOF)  $m/z$  659.3316 (659.3349 calcd for C<sub>41</sub>H<sub>48</sub>O<sub>6</sub>Na [M+Na]<sup>+</sup>).

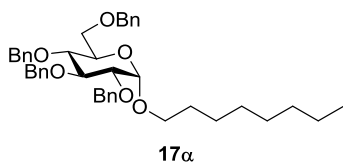

***n*-Octyl 2,3,4,6-tetra-*O*-benzyl- $\alpha$ -D-glucopyranoside (17 $\alpha$ )<sup>1</sup>**: Colorless syrup;  $R_f$  0.45 (6/1 *n*-hexane/EtOAc);  $[\alpha]_D^{33} +37.6^\circ$  (*c* 1.10, CHCl<sub>3</sub>); <sup>1</sup>H NMR (500 MHz, CDCl<sub>3</sub>)  $\delta$  0.83-0.92 (3H, m), 1.20-1.40 (10H, m), 1.58-1.67 (2H, m), 3.41 (1H, dt, *J* = 10.0 and 6.5 Hz, OCH<sub>2</sub>), 3.55 (1H, dd, *J* = 9.5 and 4.0 Hz, H-2), 3.58-3.68 (1H, m), 3.62 (1H, dd, *J* = 10.0 and 4.0 Hz, H-6), 3.63 (1H, dd, *J* = 9.5 and 4.5 Hz, H-4), 3.72 (1H, dd, *J* = 10.0 and 4.0 Hz, H-6), 3.78 (1H, ddd, *J* = 10.0, 5.0 and 4.0 Hz, H-5), 3.98 (1H, dd, *J* = 9.5 and 9.5 Hz, H-3), 4.47 and 4.61 (2H, ABq, *J* = 12.0 Hz, ArCH<sub>2</sub>), 4.47 and 4.83 (2H, ABq, *J* = 10.5 Hz, ArCH<sub>2</sub>), 4.65 and 4.78 (2H, ABq, *J* = 12.5 Hz, ArCH<sub>2</sub>), 4.75 (1H, d, *J* = 3.5 Hz, H-1), 4.81 and 4.99 (2H, d, *J* = 11.0 Hz, ArCH<sub>2</sub>), 7.10-7.16 (2H, m, ArH), 7.22-7.39 (18H, m, ArH); <sup>13</sup>C NMR (500 MHz, CDCl<sub>3</sub>)  $\delta$  14.1, 22.7, 26.2, 29.2, 29.4, 31.8, 68.2, 68.5, 70.0, 73.1, 73.4, 75.1, 75.7, 77.8, 80.1, 82.1, 96.9, 127.5, 127.6, 127.7, 127.8, 127.9 $\times$ 2, 128.0, 128.4 $\times$ 2, 138.0, 138.3, 138.4, 138.9; HRMS (ESI-TOF) *m/z* 675.3634 (675.3662 calcd for C<sub>42</sub>H<sub>52</sub>O<sub>6</sub>Na [M+Na]<sup>+</sup>).

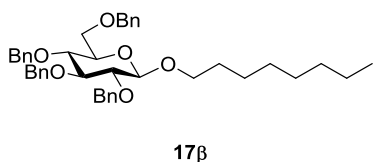

***n*-Octyl 2,3,4,6-tetra-*O*-benzyl- $\beta$ -D-glucopyranoside (17 $\beta$ )<sup>1</sup>**: White solid;  $R_f$  0.50 (6/1 *n*-hexane/EtOAc);  $[\alpha]_D^{33} +7.0^\circ$  (*c* 0.46, CHCl<sub>3</sub>); mp 33.5-34.0 °C; <sup>1</sup>H NMR (500 MHz, CDCl<sub>3</sub>)  $\delta$  0.82-0.93 (3H, m), 1.19-1.46 (10H, m), 1.58-1.74 (2H, m), 3.44 (1H, dd, *J* = 9.0 and 7.5 Hz, H-2), 3.42-3.55 (2H, m), 3.57 (1H, dd, *J* = 9.0 and 9.0 Hz, H-3), 3.63-3.71 (1H, m), 3.64 (1H, dd, *J* = 9.0 and 9.0 Hz, H-4), 3.75 (1H, dd, *J* = 10.5 and 2.0 Hz, H-6), 3.96 (1H, dt, *J* = 9.5 and 6.0 Hz, OCH<sub>2</sub>), 4.38 (1H, d, *J* = 8.0 Hz, H-1), 4.52 and 4.81 (2H, ABq, *J* = 10.5 Hz, ArCH<sub>2</sub>), 4.56 and 4.61 (2H, ABq, *J* = 12.0 Hz, ArCH<sub>2</sub>), 4.71 and 4.96 (2H, ABq, *J* = 11.5 Hz, ArCH<sub>2</sub>), 4.78 and 4.93 (2H, ABq, *J* = 11.0 Hz, ArCH<sub>2</sub>), 7.13-7.18 (2H, m, ArH), 7.23-7.38 (18H, m, ArH); <sup>13</sup>C NMR (500 MHz, CDCl<sub>3</sub>)  $\delta$  14.1, 22.7, 26.2, 29.3, 29.4, 29.8, 31.8, 69.0, 70.2, 73.4, 74.8 $\times$ 2, 75.0, 75.7, 77.9, 82.3, 84.7, 103.6, 127.6 $\times$ 2, 127.7, 127.9, 128.0, 128.1, 128.3, 128.4 $\times$ 2, 138.1, 138.2, 138.5, 138.6; HRMS (ESI-TOF) *m/z* 675.3640 (675.3662 calcd for C<sub>42</sub>H<sub>52</sub>O<sub>6</sub>Na [M+Na]<sup>+</sup>).

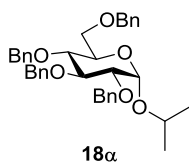

**Isopropyl 2,3,4,6-tetra-*O*-benzyl- $\alpha$ -D-glucopyranoside (18 $\alpha$ )<sup>1</sup>:** Colorless syrup;  $R_f$  0.60 (60/1 chloroform/EtOAc);  $[\alpha]_D^{27} +37.2^\circ$  ( $c$  1.38, CHCl<sub>3</sub>); <sup>1</sup>H NMR (500 MHz, CDCl<sub>3</sub>)  $\delta$  1.17 and 1.22 (each 3H, d,  $J$  = 6.0 Hz, CH<sub>3</sub>), 3.55 (1H, dd,  $J$  = 10.0 and 3.5 Hz, H-2), 3.61 (1H, dd,  $J$  = 10.0 and 2.0 Hz, H-6), 3.64 (1H, dd,  $J$  = 9.8 and 8.5 Hz, H-4), 3.73 (1H, dd,  $J$  = 10.5 and 3.5 Hz, H-6), 3.84 (1H, ddd,  $J$  = 10.0, 3.5 and 1.5 Hz, H-5), 3.89 (1H, qq,  $J$  = 6.0 Hz, OCH), 3.99 (1H, dd,  $J$  = 9.0 and 9.0 Hz, H-3), 4.46 and 4.61 (2H, ABq,  $J$  = 12.0 Hz, ArCH<sub>2</sub>), 4.47 and 4.83 (2H, ABq,  $J$  = 10.5 Hz, ArCH<sub>2</sub>), 4.65 and 4.77 (2H, ABq,  $J$  = 12.0 Hz, ArCH<sub>2</sub>), 4.81 and 5.00 (2H, ABq,  $J$  = 10.5 Hz, ArCH<sub>2</sub>), 7.10-7.16 (2H, m, ArH), 7.22-7.41 (18H, m, ArH); <sup>13</sup>C NMR (500 MHz, CDCl<sub>3</sub>)  $\delta$  21.1, 23.2, 68.5, 69.0, 70.0, 73.1, 73.4, 75.1, 75.7, 77.9, 79.9, 82.1, 94.8, 127.5, 127.6, 127.7, 127.8, 127.9 $\times$ 2, 128.0, 128.2, 128.3, 128.4 $\times$ 2, 138.0, 138.2, 138.3, 139.0; HRMS (ESI-TOF) 605.2849 (605.2879 calcd for C<sub>37</sub>H<sub>42</sub>O<sub>6</sub>Na [M+Na]<sup>+</sup>).

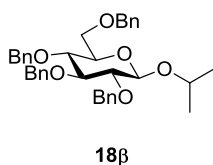

**Isopropyl 2,3,4,6-tetra-*O*-benzyl- $\beta$ -D-glucopyranoside (18 $\beta$ )<sup>1</sup>:** White solid;  $R_f$  0.46 (5/1 *n*-hexane/EtOAc);  $[\alpha]_D^{27} +10.3^\circ$  ( $c$  0.64, CHCl<sub>3</sub>); mp 109.5-110.5 °C; <sup>1</sup>H NMR (500 MHz, CDCl<sub>3</sub>)  $\delta$  1.24 and 1.32 (each 3H, d,  $J$  = 6.0 Hz, CH<sub>3</sub>), 3.43 (1H, dd,  $J$  = 9.0 and 7.5 Hz, H-4), 3.44 (1H, ddd,  $J$  = 9.0, 4.0 and 2.0 Hz, H-5), 3.54 (1H, dd,  $J$  = 9.0 and 9.0 Hz, H-3), 3.63 (1H, dd,  $J$  = 9.0 and 7.5 Hz, H-2), 3.65 (1H, dd,  $J$  = 10.0 and 4.0 Hz, H-6), 3.74 (1H, dd,  $J$  = 11.0 and 2.0 Hz, H-6), 4.02 (1H, qq,  $J$  = 6.0 Hz, OCH), 4.46 (1H, d,  $J$  = 7.5 Hz, H-1), 4.53 and 4.82 (2H, ABq,  $J$  = 11.0 Hz, ArCH<sub>2</sub>), 4.58 and 4.61 (2H, ABq,  $J$  = 12.5 Hz, ArCH<sub>2</sub>), 4.70 and 4.97 (2H, ABq,  $J$  = 11.0 Hz, ArCH<sub>2</sub>), 4.78 and 4.92 (2H, ABq,  $J$  = 11.0 Hz, ArCH<sub>2</sub>), 7.14-7.19 (2H, m, ArH), 7.23-7.39 (18H, m, ArH); <sup>13</sup>C NMR (500 MHz, CDCl<sub>3</sub>)  $\delta$  22.2, 23.7, 69.2, 72.4, 73.4, 74.8, 75.0, 75.7, 78.0, 82.3, 84.8, 102.2, 127.5, 127.6 $\times$ 2, 127.7 $\times$ 2, 127.9, 128.0, 128.2, 128.3, 128.4, 138.1, 138.3, 138.5, 138.7; HRMS (ESI-TOF) 605.2907 (605.2879 calcd for C<sub>37</sub>H<sub>42</sub>O<sub>6</sub>Na [M+Na]<sup>+</sup>).

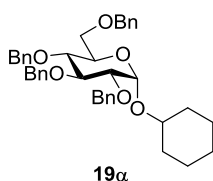

**Cyclohexyl 2,3,4,6-tetra-*O*-benzyl- $\alpha$ -D-glucopyranoside (19 $\alpha$ )<sup>1</sup>:** Colorless syrup;  $R_f$  0.64 (60/1 chloroform/EtOAc);  $[\alpha]_D^{27} +51.0^\circ$  ( $c$  1.71, CHCl<sub>3</sub>); <sup>1</sup>H NMR (500 MHz, CDCl<sub>3</sub>)  $\delta$  1.12-1.60 (6H, m), 1.69-1.96 (4H, m), 3.51-3.68 (1H, m), 3.55 (1H, dd,  $J$  = 10.0 and 3.5 Hz, H-2), 3.62 (1H, dd,  $J$  = 11.0 and 2.0 Hz, H-6), 3.63 (1H, dd,  $J$  = 10.0 and 9.5 Hz, H-4), 3.74 (1H, dd,  $J$  = 10.5 and 4.0 Hz, H-6), 3.88 (1H, ddd,  $J$  = 10.0, 4.0 and 2.0 Hz, H-5), 4.00 (1H, dd,  $J$  = 9.0 and 9.0 Hz, H-3), 4.46 and 4.61 (2H, ABq,  $J$  = 12.0 Hz, ArCH<sub>2</sub>), 4.46 and 4.83 (2H, ABq,  $J$  = 10.5 Hz, ArCH<sub>2</sub>), 4.66 and 4.74 (2H, ABq,  $J$  = 12.0 Hz, ArCH<sub>2</sub>), 4.81 and 5.00 (2H, ABq,  $J$  = 10.5 Hz, ArCH<sub>2</sub>), 4.95 (1H, d,  $J$  = 3.5 Hz, H-1), 7.11-7.16 (2H, m, ArH), 7.22-7.38 (18H, m, ArH); <sup>13</sup>C NMR (500 MHz, CDCl<sub>3</sub>)  $\delta$  24.1, 24.4, 25.6, 31.4, 33.3, 68.6, 70.0, 72.9, 73.4, 75.1, 75.3, 75.6, 77.3, 77.9, 80.0, 82.1, 94.7, 127.5, 127.6, 127.7, 127.8 $\times$ 2, 127.9, 128.0, 128.1, 128.3 $\times$ 2, 138.0, 138.2, 138.3, 139.0; HRMS (ESI-TOF) 645.3193 (645.3192 calcd for C<sub>40</sub>H<sub>46</sub>O<sub>6</sub>Na [M+Na]<sup>+</sup>).

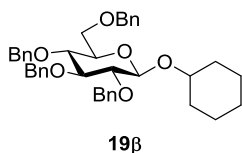

**Cyclohexyl 2,3,4,6-tetra-*O*-benzyl- $\beta$ -D-glucopyranoside (19 $\beta$ )<sup>1</sup>:** White solid;  $R_f$  0.48 (60/1 chloroform/EtOAc);  $[\alpha]_D^{27} +8.7^\circ$  ( $c$  0.90, CHCl<sub>3</sub>); mp 104-106 °C; <sup>1</sup>H NMR (500 MHz, CDCl<sub>3</sub>)  $\delta$  1.19-1.60 (6H, m), 1.70-1.81 (2H, m), 1.90-2.09 (2H, m), 3.44 (1H, dd,  $J$  = 9.5 and 9.5 Hz, H-3), 3.45 (1H, ddd,  $J$  = 9.0, 5.0 and 1.5 Hz, H-5), 3.51-3.79 (2H, m), 3.62 (1H, dd,  $J$  = 9.0 and 8.0 Hz, H-2), 3.75 (1H, dd,  $J$  = 11.0 and 2.0 Hz, H-6), 4.50 (1H, d,  $J$  = 8.0 Hz, H-1), 4.54 and 4.82 (2H, ABq,  $J$  = 11.5 Hz, ArCH<sub>2</sub>), 4.56 and 4.61 (2H, ABq,  $J$  = 12.5 Hz, ArCH<sub>2</sub>), 4.71 and 4.99 (2H, ABq,  $J$  = 10.5 Hz, ArCH<sub>2</sub>), 4.78 and 4.92 (2H, ABq,  $J$  = 10.5 Hz, ArCH<sub>2</sub>), 7.15-7.20 (2H, m, ArH), 7.24-7.38 (18H, m, ArH); <sup>13</sup>C NMR (500 MHz, CDCl<sub>3</sub>)  $\delta$  24.0, 24.1, 25.6, 32.0, 33.8, 69.2, 73.4, 74.8 $\times$ 2, 75.0, 75.7, 77.8, 78.0, 82.3, 84.8, 101.9, 127.5 $\times$ 2, 127.6, 127.7 $\times$ 2, 127.9, 128.0, 128.2, 128.3 $\times$ 2, 128.4, 138.1, 138.3, 138.5, 138.7; HRMS (ESI-TOF)  $m/z$  645.3163 (645.3192 calcd for C<sub>38</sub>H<sub>44</sub>O<sub>6</sub>Na [M+Na]<sup>+</sup>).

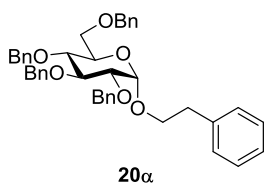

**20 $\alpha$**

**2-Phenylethyl 2,3,4,6-tetra-*O*-benzyl- $\alpha$ -D-glucopyranoside (20 $\alpha$ ):** Colorless syrup;  $R_f$  0.50 (3/1 *n*-hexane/EtOAc);  $[\alpha]_D^{24} +45.3^\circ$  (*c* 1.26, CHCl<sub>3</sub>); <sup>1</sup>H NMR (500 MHz, CDCl<sub>3</sub>)  $\delta$  2.88-3.00 (2H, m), 3.50-3.71 (6H, m), 3.78-3.83 (1H, m), 3.97 (1H, dd, *J* = 9.5 and 9.5 Hz, H-3), 4.43 and 4.57 (2H, ABq, *J* = 12.5 Hz, ArCH<sub>2</sub>), 4.45 and 4.81 (2H, ABq, *J* = 11.0 Hz, ArCH<sub>2</sub>), 4.62 and 4.76 (2H, ABq, *J* = 12.0 Hz, ArCH<sub>2</sub>), 4.77 (1H, d, *J* = 3.5 Hz, H-1), 4.82 and 4.98 (2H, ABq, *J* = 10.5 Hz, ArCH<sub>2</sub>), 7.10-7.16 (2H, m, ArH), 7.16-7.40 (23H, m, ArH); <sup>13</sup>C NMR (500 MHz, CDCl<sub>3</sub>)  $\delta$  36.0, 68.4, 68.7, 70.1, 73.2, 73.4, 74.9, 75.7, 77.6, 80.0, 82.0, 96.8, 126.3, 127.5, 127.6 $\times$ 2, 127.7, 127.8 $\times$ 2, 128.0 $\times$ 2, 128.3, 128.4 $\times$ 2, 129.0, 137.9, 138.3 $\times$ 2, 138.6, 138.8; HRMS (ESI-TOF) *m/z* 667.3035 (667.3036 calcd for C<sub>42</sub>H<sub>44</sub>O<sub>6</sub>Na [M+Na]<sup>+</sup>).

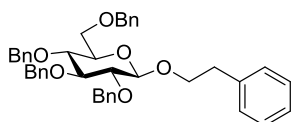

**20 $\beta$**

**2-Phenylethyl 2,3,4,6-tetra-*O*-benzyl- $\beta$ -D-glucopyranoside (20 $\beta$ ):** White solid;  $R_f$  0.55 (3/1 *n*-hexane/EtOAc);  $[\alpha]_D^{25} +12.3^\circ$  (*c* 1.16, CHCl<sub>3</sub>); mp 65.0-66.5 °C; <sup>1</sup>H NMR (500 MHz, CDCl<sub>3</sub>)  $\delta$  2.93-3.03 (2H, t, *J* = 7.0 Hz, ArCH<sub>2</sub>), 3.40-3.49 (2H, m), 3.55-3.82 (5H, m), 4.21 (1H, m), 4.41 (1H, d, *J* = 8.0 Hz, H-1), 4.52 and 4.81 (2H, ABq, *J* = 11.0 Hz, ArCH<sub>2</sub>), 4.54 and 4.61 (2H, ABq, *J* = 12.5 Hz, ArCH<sub>2</sub>), 4.60 and 4.75 (2H, ABq, *J* = 11.5 Hz, ArCH<sub>2</sub>), 4.77 and 4.91 (2H, ABq, *J* = 11.0 Hz, ArCH<sub>2</sub>), 7.12-7.39 (25H, m, ArH); <sup>13</sup>C NMR (500 MHz, CDCl<sub>3</sub>)  $\delta$  36.3, 68.9, 70.6, 73.5, 74.7, 74.8, 75.0, 75.7, 77.8, 82.2, 84.6, 103.6, 126.3, 127.6 $\times$ 2, 127.7, 127.8 $\times$ 2, 128.0, 128.1, 128.3 $\times$ 2, 128.4, 128.9, 138.1 $\times$ 2, 138.4, 138.6, 138.7; HRMS (ESI-TOF) *m/z* 667.3055 (667.3036 calcd for C<sub>42</sub>H<sub>44</sub>O<sub>6</sub>Na [M+Na]<sup>+</sup>).

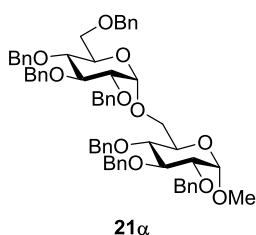

**Methyl 2,3,4-tri-*O*-benzyl-6-*O*-(2',3',4',6'-tetra-*O*-benzyl- $\alpha$ -D-glucopyranosyl)- $\alpha$ -D-glucopyranoside (21 $\alpha$ )<sup>1</sup>:** White solid;  $R_f$  0.35 (3/1 *n*-hexane/EtOAc);  $[\alpha]_D^{28} +57.1^\circ$  (*c* 0.91, CHCl<sub>3</sub>); mp 102.5-103.5 °C; <sup>1</sup>H NMR (500 MHz, CDCl<sub>3</sub>)  $\delta$  3.35 (3H, s, OMe), 3.44 (1H, dd,  $J = 9.5$  and 3.5 Hz), 3.49-3.86 (9H, m), 3.90-4.03 (2H, m), 4.37-4.48 (2H, m), 4.53-4.67 (5H, m), 4.55 (1H, d,  $J = 3.5$  Hz, H-1), 4.71 (1H, ABq,  $J = 12.0$  Hz, ArCH<sub>2</sub>), 4.77 (1H, ABq,  $J = 11.0$  Hz, ArCH<sub>2</sub>), 4.81 (1H, ABq,  $J = 10.5$  Hz, ArCH<sub>2</sub>), 4.82 (1H, ABq,  $J = 11.0$  Hz, ArCH<sub>2</sub>), 4.92 (1H, ABq,  $J = 11.5$  Hz, ArCH<sub>2</sub>), 4.93 (1H, ABq,  $J = 11.5$  Hz, ArCH<sub>2</sub>), 4.96 (1H, ABq,  $J = 11.5$  Hz, ArCH<sub>2</sub>), 4.98 (1H, d,  $J = 4.0$  Hz, H-1'), 7.08-7.13 (2H, m, ArH), 7.20-7.36 (33H, m, ArH); <sup>13</sup>C NMR (500 MHz, CDCl<sub>3</sub>)  $\delta$  55.1, 66.0, 68.4, 70.2, 70.3, 72.4, 73.4 $\times$ 2, 74.9 $\times$ 2, 75.5, 75.7, 77.6, 77.7, 79.9, 80.1, 81.7, 82.1, 97.2, 97.9, 127.5, 127.6, 127.7, 127.9 $\times$ 2, 128.0 $\times$ 2, 128.3 $\times$ 3, 128.4, 138.0, 138.2, 138.4 $\times$ 2, 138.8; HRMS (ESI-TOF)  $m/z$  1009.4470 (1009.4503 calcd for C<sub>62</sub>H<sub>66</sub>O<sub>11</sub>Na [M+Na]<sup>+</sup>).

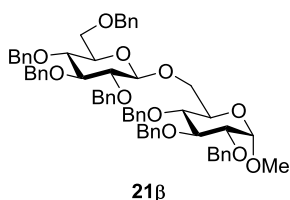

**Methyl 2,3,4-tri-*O*-benzyl-6-*O*-(2',3',4',6'-tetra-*O*-benzyl- $\beta$ -D-glucopyranosyl)- $\alpha$ -D-glucopyranoside (21 $\beta$ )<sup>1</sup>:** White solid;  $R_f$  0.35 (3/1 *n*-hexane/EtOAc);  $[\alpha]_D^{27} +17.4^\circ$  (*c* 1.13, CHCl<sub>3</sub>); mp 133-134 °C; <sup>1</sup>H NMR (500 MHz, CDCl<sub>3</sub>)  $\delta$  3.32 (3H, s, OMe), 3.40-3.75 (9H, m), 3.82 (1H, dd,  $J = 10.5$  and 3.0 Hz), 3.99 (1H, dd,  $J = 9.5$  and 9.5 Hz, H-3), 4.18 (1H, dd,  $J = 11.0$  and 2.0 Hz), 4.34 (1H, d,  $J = 8.0$  Hz, H-1'), 4.47-4.60 (5H, m), 4.61 (1H, d,  $J = 3.5$  Hz, H-1), 4.65 (1H, ABq,  $J = 12.0$  Hz, ArCH<sub>2</sub>), 4.71 (1H, ABq,  $J = 11.0$  Hz, ArCH<sub>2</sub>), 4.74-4.82 (3H, m), 4.80 (1H, ABq,  $J = 11.0$  Hz, ArCH<sub>2</sub>), 4.90 (1H, ABq,  $J = 10.5$  Hz, ArCH<sub>2</sub>), 4.96 (1H, ABq,  $J = 11.0$  Hz, ArCH<sub>2</sub>), 4.97 (1H, ABq,  $J = 11.5$  Hz, ArCH<sub>2</sub>), 7.13-7.37 (35H, m, ArH); <sup>13</sup>C NMR (500 MHz, CDCl<sub>3</sub>)  $\delta$  55.2, 68.5, 69.0, 69.8, 73.3, 73.4, 74.9, 75.0 $\times$ 2, 75.7 $\times$ 2, 77.9, 78.0, 79.8, 82.0 $\times$ 2, 84.8, 98.0, 103.8, 127.5, 127.6 $\times$ 2, 127.7, 127.9 $\times$ 3, 128.0 $\times$ 2, 128.2, 128.4 $\times$ 2, 128.5, 138.1 $\times$ 2, 138.2, 138.3 $\times$ 2, 138.6, 139.0; HRMS (ESI-TOF)  $m/z$  1009.4460 (1009.4503 calcd for C<sub>62</sub>H<sub>66</sub>O<sub>11</sub>Na [M+Na]<sup>+</sup>).



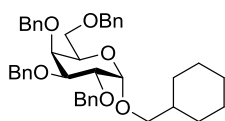

25 $\alpha$

**Cyclohexylmethyl 2,3,4,6-tetra-*O*-benzyl- $\alpha$ -D-galactopyranoside (25 $\alpha$ )<sup>2</sup>:** Colorless syrup;  $R_f$  0.67 (3/1 *n*-hexane/EtOAc);  $[\alpha]_D^{28} +37.3^\circ$  (*c* 0.49, CHCl<sub>3</sub>); <sup>1</sup>H NMR (500 MHz, CDCl<sub>3</sub>)  $\delta$  0.82-1.00 (2H, m), 1.08-1.34 (3H, m), 1.58-1.87 (6H, m), 3.21 (1H, dd, *J* = 9.5 and 6.0 Hz, OCH<sub>2</sub>), 3.42 (1H, dd, *J* = 9.5 and 7.5 Hz, OCH<sub>2</sub>), 3.48-3.55 (2H, m), 3.90-4.00 (3H, m), 4.03 (1H, dd, *J* = 9.5 and 4.0 Hz), 4.39 and 4.48 (2H, ABq, *J* = 12.0 Hz, ArCH<sub>2</sub>), 4.57 and 4.94 (2H, ABq, *J* = 11.5 Hz, ArCH<sub>2</sub>), 4.66 and 4.81 (2H, ABq, *J* = 12.5 Hz, ArCH<sub>2</sub>), 4.73 and 4.85 (2H, ABq, *J* = 12.0 Hz, ArCH<sub>2</sub>), 4.79 (1H, d, *J* = 3.5 Hz, H-1), 7.21-7.42 (20H, m, ArH); <sup>13</sup>C NMR (500 MHz, CDCl<sub>3</sub>)  $\delta$  25.7, 25.8, 26.6, 30.0, 30.2, 37.5, 69.1, 69.2, 73.2, 73.4, 73.8, 74.1, 75.1, 79.1, 97.6, 127.7, 127.9, 128.2 $\times$ 2, 128.3 $\times$ 2, 138.1, 138.7, 138.8, 138.9; HRMS (ESI-TOF) *m/z* 659.3348 (659.3349 calcd for C<sub>41</sub>H<sub>48</sub>O<sub>6</sub>Na [M+Na]<sup>+</sup>).

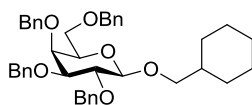

25 $\beta$

**Cyclohexylmethyl 2,3,4,6-tetra-*O*-benzyl- $\beta$ -D-galactopyranoside (25 $\beta$ )<sup>2</sup>:** White solid;  $R_f$  0.60 (3/1 *n*-hexane/EtOAc);  $[\alpha]_D^{28} -7.2^\circ$  (*c* 1.45, CHCl<sub>3</sub>); mp 101.8-102.8 °C; <sup>1</sup>H NMR (500 MHz, CDCl<sub>3</sub>)  $\delta$  0.86-1.04 (2H, m), 1.06-1.33 (3H, m), 1.58-1.90 (6H, m), 3.27 (1H, dd, *J* = 9.5 and 7.5 Hz, OCH<sub>2</sub>), 3.47-3.62 (4H, m), 3.75 (1H, dd, *J* = 9.0 and 5.0 Hz, OCH<sub>2</sub>), 3.80 (1H, dd, *J* = 10.0 and 7.5 Hz, H-2), 3.88 (1H, br d, *J* = 2.5 Hz, H-4), 4.32 (1H, d, *J* = 7.5 Hz, H-1), 4.40 and 4.45 (2H, ABq, *J* = 11.5 Hz, ArCH<sub>2</sub>), 4.62 and 4.93 (2H, ABq, *J* = 11.5 Hz, ArCH<sub>2</sub>), 4.70 and 4.76 (2H, ABq, *J* = 12.0 Hz, ArCH<sub>2</sub>), 4.75 and 4.93 (2H, ABq, *J* = 11.5 Hz, ArCH<sub>2</sub>), 7.23-7.38 (20H, m, ArH); <sup>13</sup>C NMR (500 MHz, CDCl<sub>3</sub>)  $\delta$  25.8 $\times$ 2, 29.8, 30.2, 68.9, 73.1, 73.4, 73.5, 74.4, 75.2, 75.6, 79.6, 82.3, 104.2, 127.5, 127.7, 127.9, 128.1, 128.2, 128.3 $\times$ 2, 128.4, 137.9, 138.6, 138.7 $\times$ 2; HRMS (ESI-TOF) *m/z* 659.3322 (659.3349 calcd for C<sub>41</sub>H<sub>48</sub>O<sub>6</sub>Na [M+Na]<sup>+</sup>).

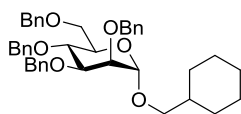

**26 $\alpha$**

**Cyclohexylmethyl 2,3,4,6-tetra-*O*-benzyl- $\alpha$ -D-mannopyranoside (26 $\alpha$ )<sup>3</sup>:** Colorless syrup;  $R_f$  0.60 (4/1 *n*-hexane/EtOAc);  $[\alpha]_D^{25} +33.3^\circ$  (*c* 0.56, CHCl<sub>3</sub>); <sup>1</sup>H NMR (500 MHz, CDCl<sub>3</sub>)  $\delta$  0.80-1.74 (11H, m), 3.15 (1H, dd,  $J = 9.5$  and 6.0 Hz, OCH<sub>2</sub>), 3.45 (1H, dd,  $J = 9.0$  and 7.0 Hz, OCH<sub>2</sub>), 3.68-3.81 (4H, m), 3.86-4.01 (2H, m), 4.48-4.79 (7H, m, ArCH<sub>2</sub>), 4.82 (1H, d,  $J = 1.5$  Hz, H-1), 4.87 (1H, ABq,  $J = 11.0$  Hz, ArCH<sub>2</sub>), 7.14-7.39 (20H, m, ArH); <sup>13</sup>C NMR (500 MHz, CDCl<sub>3</sub>)  $\delta$  25.7, 25.8, 26.5, 29.8, 30.0, 37.8, 69.3, 71.8, 72.2, 72.5, 73.1, 73.3, 74.9, 75.0, 75.2, 80.3, 97.9, 127.4, 127.5, 127.6, 127.7 $\times$ 2, 127.8, 128.1, 128.2, 128.3 $\times$ 2, 138.4, 138.5, 138.6; HRMS (ESI-TOF)  $m/z$  659.3326 (659.3349 calcd for C<sub>41</sub>H<sub>48</sub>O<sub>6</sub>Na [M+Na]<sup>+</sup>).

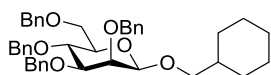

**26 $\beta$**

**Cyclohexylmethyl 2,3,4,6-tetra-*O*-benzyl- $\beta$ -D-mannopyranoside (26 $\beta$ )<sup>3</sup>:** White solid;  $R_f$  0.60 (4/1 *n*-hexane/EtOAc);  $[\alpha]_D^{25} -49.0^\circ$  (*c* 0.92, CHCl<sub>3</sub>); mp 64.5-66.0 °C; <sup>1</sup>H NMR (500 MHz, CDCl<sub>3</sub>)  $\delta$  0.83-1.87 (11H, m), 3.20 (1H, dd,  $J = 9.0$  and 6.5 Hz, OCH<sub>2</sub>), 3.44 (1H, ddd,  $J = 8.0$ , 6.5 and 4.0 Hz, H-5), 3.50 (1H, dd,  $J = 9.5$  and 3.0 Hz, OCH<sub>2</sub>), 3.71-3.92 (5H, m), 4.35 (1H, br s, H-1), 4.43 and 4.50 (2H, ABq,  $J = 12.0$  Hz, ArCH<sub>2</sub>), 4.53 and 4.91 (2H, ABq,  $J = 11.0$  Hz, ArCH<sub>2</sub>), 4.60 and 4.63 (2H, ABq,  $J = 12.0$  Hz, ArCH<sub>2</sub>), 4.87 and 5.00 (2H, ABq,  $J = 13.0$  Hz, ArCH<sub>2</sub>), 7.16-7.49 (20H, m, ArH); <sup>13</sup>C NMR (500 MHz, CDCl<sub>3</sub>)  $\delta$  25.9 $\times$ 2, 26.6, 29.9, 30.1, 38.1, 69.7, 71.3, 73.4, 73.7, 75.0, 75.1, 75.8, 75.9, 82.4, 102.0, 127.3, 127.4, 127.5, 127.6, 128.1, 128.3 $\times$ 2, 128.4, 138.2, 138.3, 138.5, 138.8; HRMS (ESI-TOF)  $m/z$  659.3380 (659.3349 calcd for C<sub>41</sub>H<sub>48</sub>O<sub>6</sub>Na [M+Na]<sup>+</sup>).

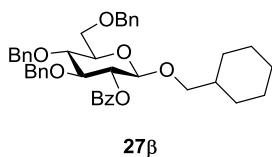

**Cyclohexylmethyl 2-*O*-benzoyl-3,4,6-tri-*O*-benzyl- $\beta$ -D-glucopyranoside (27 $\beta$ ):** White solid;  $R_f$  0.40 (4/1 *n*-hexane/EtOAc);  $[\alpha]_D^{26} +19.9^\circ$  (*c* 1.50, CHCl<sub>3</sub>); mp 83.0-84.0 °C; <sup>1</sup>H NMR (500 MHz, CDCl<sub>3</sub>)  $\delta$  0.69-0.84 (2H, m), 0.90-1.12 (3H, m), 1.40-1.63 (6H, m), 3.22 (1H, dd, *J* = 9.7 and 6.9 Hz, OCH<sub>2</sub>), 3.52-3.58 (1H, m), 3.66-3.85 (3H, m), 3.78 (1H, dd, *J* = 9.0 and 2.0 Hz, H-4), 3.81 (1H, dd, *J* = 9.2 and 9.2 Hz, H-3), 4.47 (1H, d, *J* = 8.0 Hz, H-1), 4.58 and 4.82 (2H, ABq, *J* = 10.6 Hz, ArCH<sub>2</sub>), 4.59 and 4.65 (2H, ABq, *J* = 12.3 Hz, ArCH<sub>2</sub>), 4.67 and 4.74 (2H, ABq, *J* = 11.2 Hz, ArCH<sub>2</sub>), 5.27 (1H, dd, *J* = 9.5 and 8.0 Hz, H-2), 7.08-8.06 (20H, m); <sup>13</sup>C NMR (500 MHz, CDCl<sub>3</sub>)  $\delta$  25.6, 26.4, 29.5, 29.6, 37.7, 68.8, 73.5, 73.9, 74.9, 75.0, 75.2, 75.5, 78.1, 82.7, 101.5, 127.6, 127.7, 127.8, 128.0 $\times$ 2, 128.2, 128.3 $\times$ 2, 128.4, 129.7, 130.1, 132.9, 137.8, 137.9, 138.1, 165.2; HRMS (ESI-TOF) *m/z* 673.3127 (673.3141 calcd for C<sub>41</sub>H<sub>46</sub>O<sub>7</sub>Na [M+Na]<sup>+</sup>).

## References

1. H. Nagai, K. Sasaki, S. Matsumura and K. Toshima, *Carbohydr. Res.*, 2005, **340**, 337.
2. T. Iimori, T. Shibasaki and S. Ikegami, *Tetrahedron Lett.*, 1996, **37**, 2267.
3. K. Toshima, H. Nagai, K. Kasumi, K. Kawahara and S. Matsumura, *Tetrahedron*, 2004, **60**, 5331.

# **$^1\text{H}$ and $^{13}\text{C}$ NMR spectra**

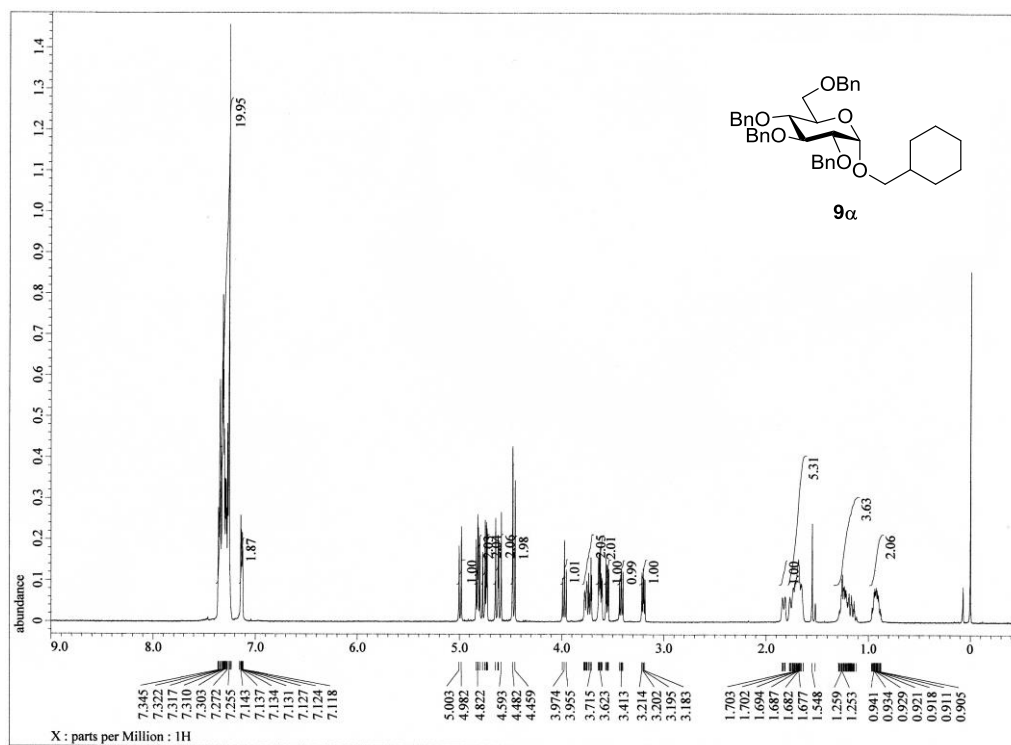

Figure S1 <sup>1</sup>H NMR spectrum of **9a**

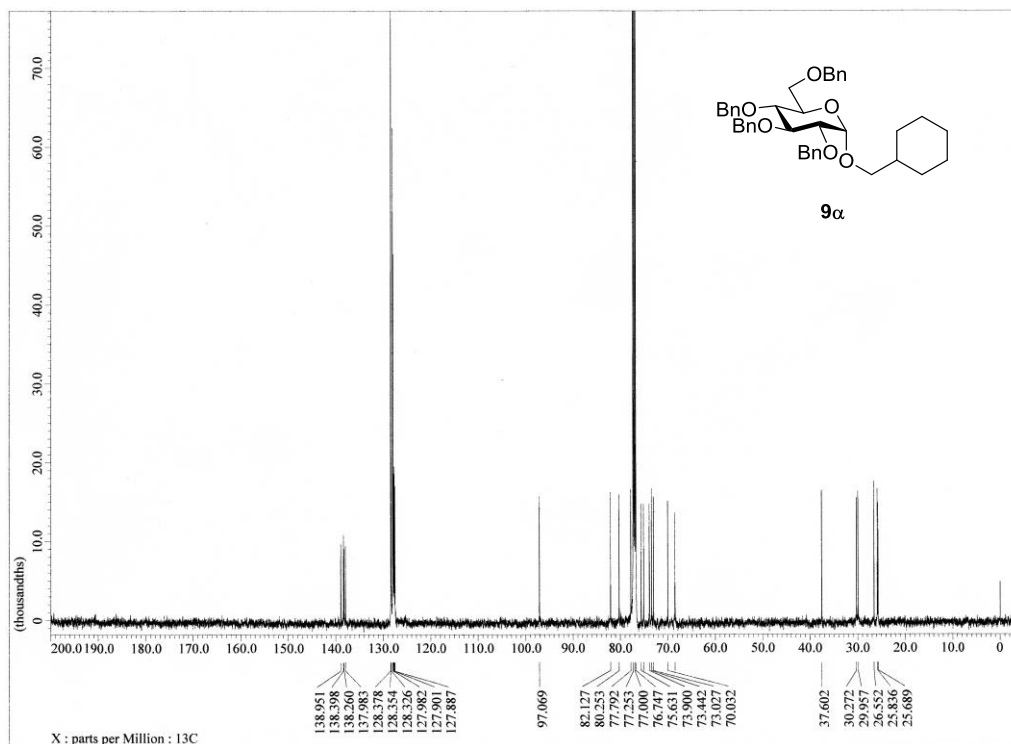

Figure S2 <sup>13</sup>C NMR spectrum of **9a**

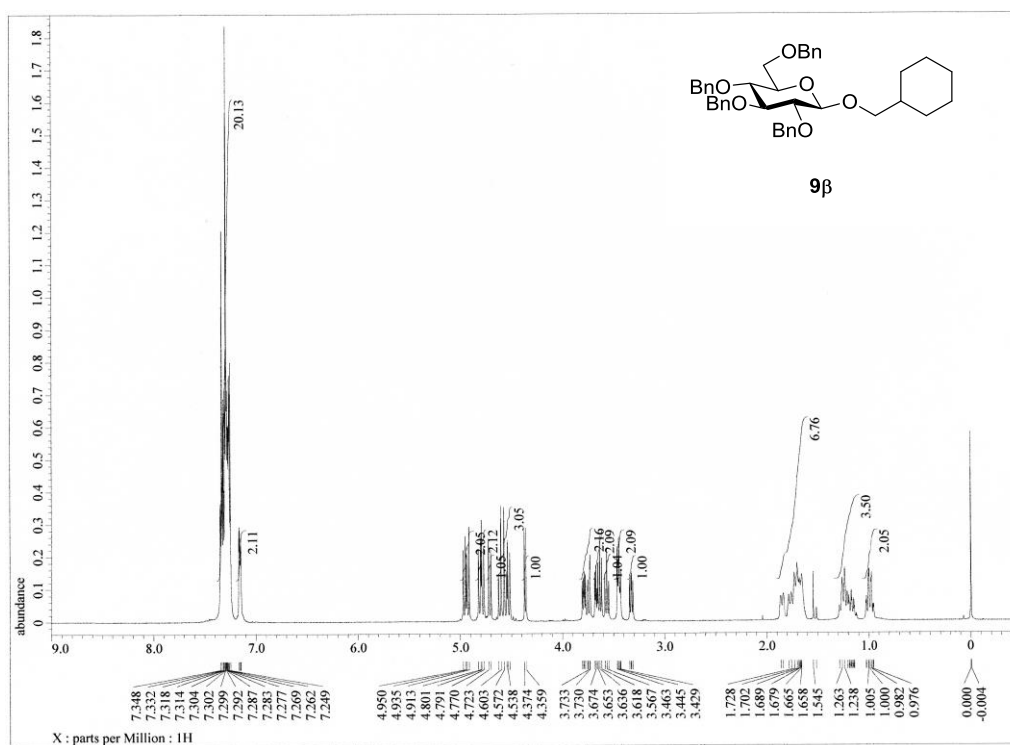

Figure S3  $^1\text{H}$  NMR spectrum of **9 $\beta$**

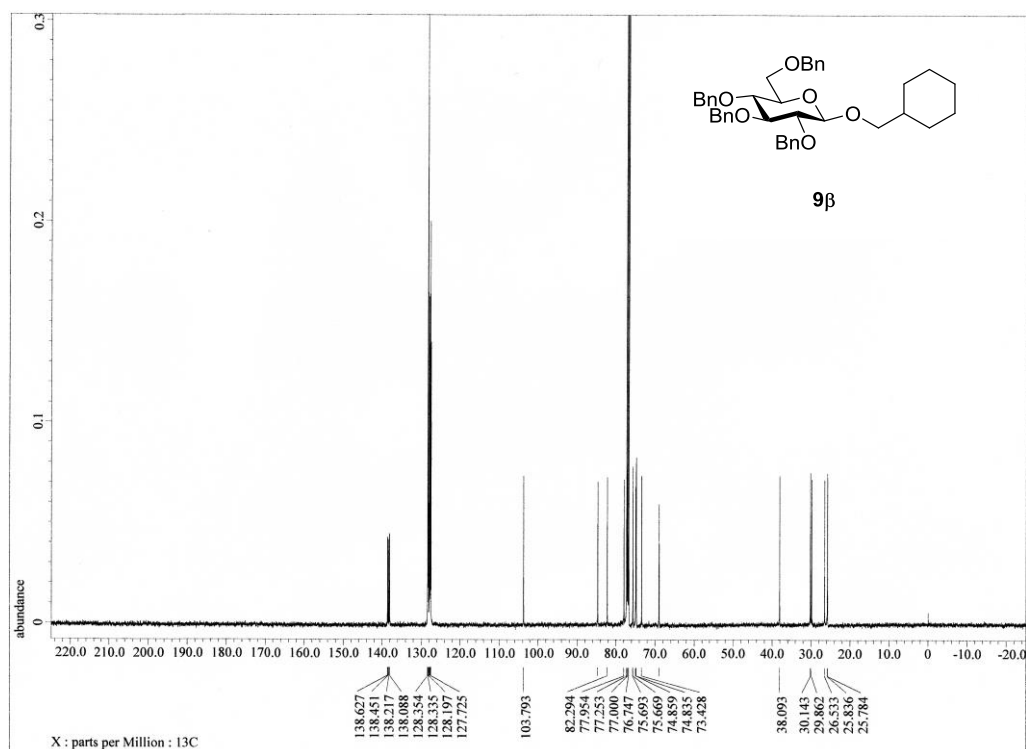

Figure S4  $^{13}\text{C}$  NMR spectrum of **9 $\beta$**

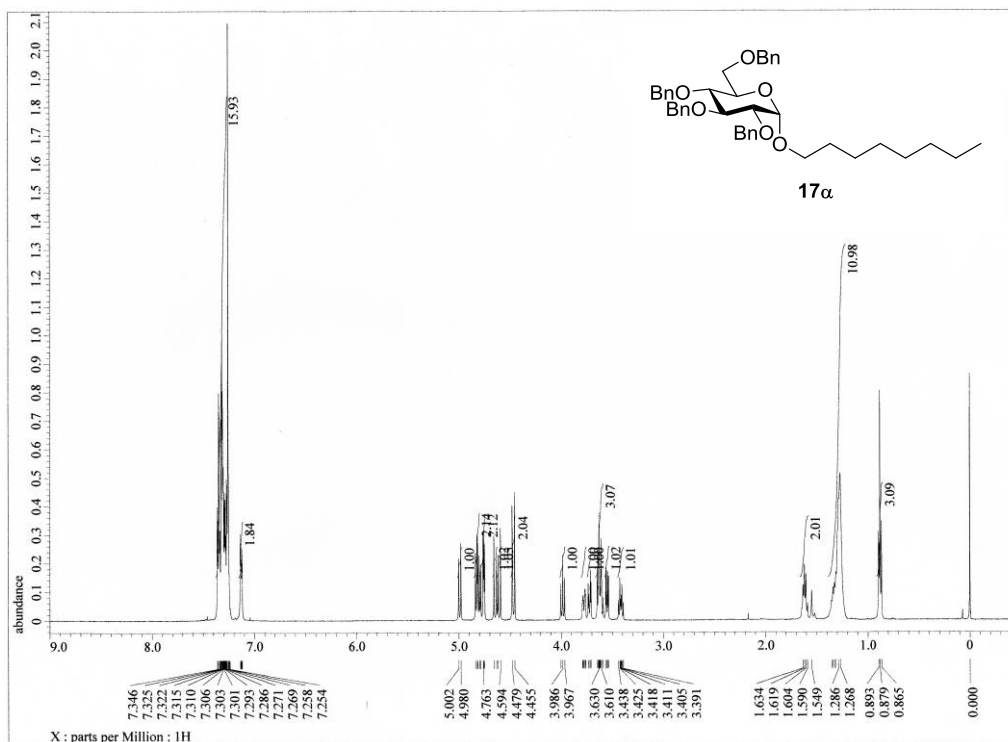

Figure S5 <sup>1</sup>H NMR spectrum of **17a**

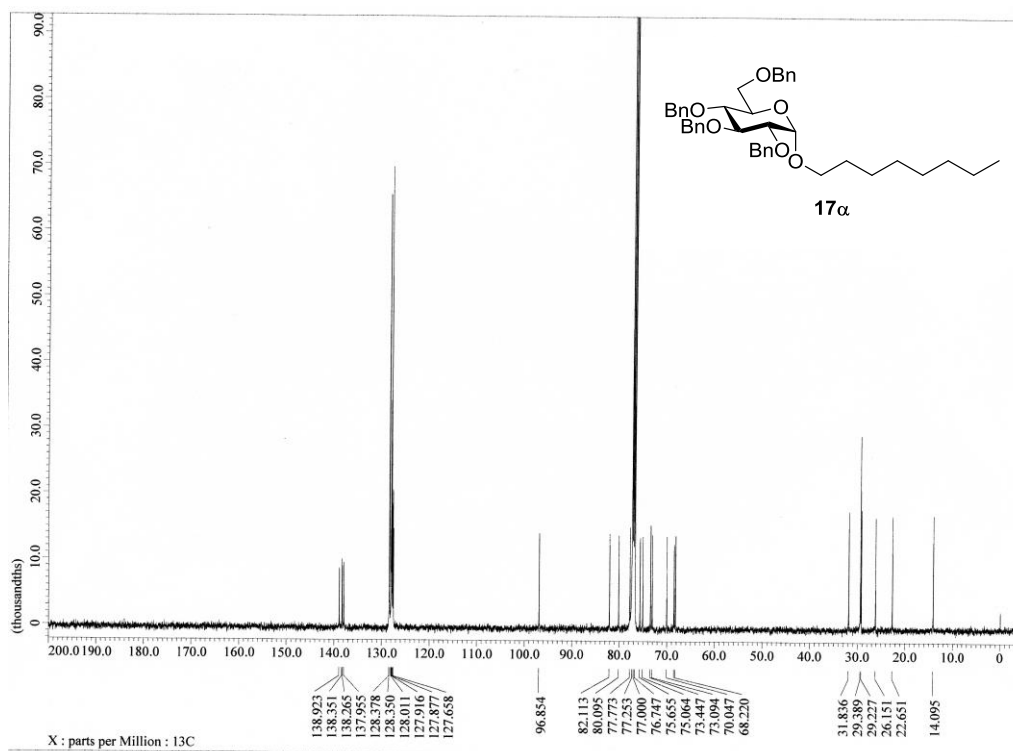

Figure S6 <sup>13</sup>C NMR spectrum of **17a**

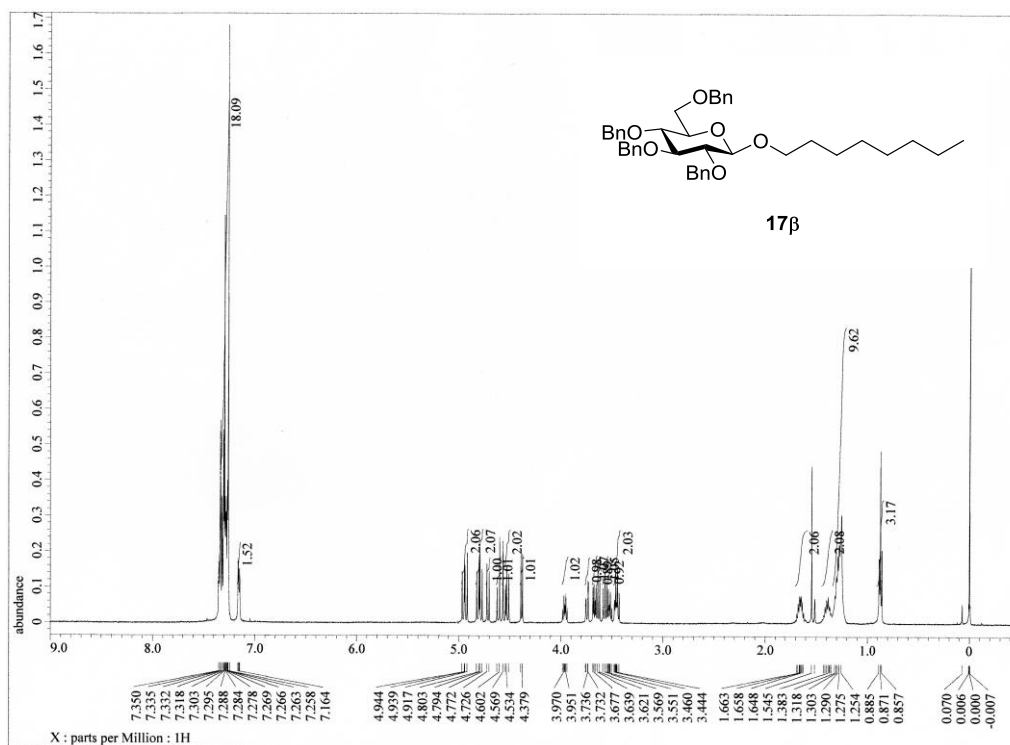

Figure S7  $^1\text{H}$  NMR spectrum of **17 $\beta$**

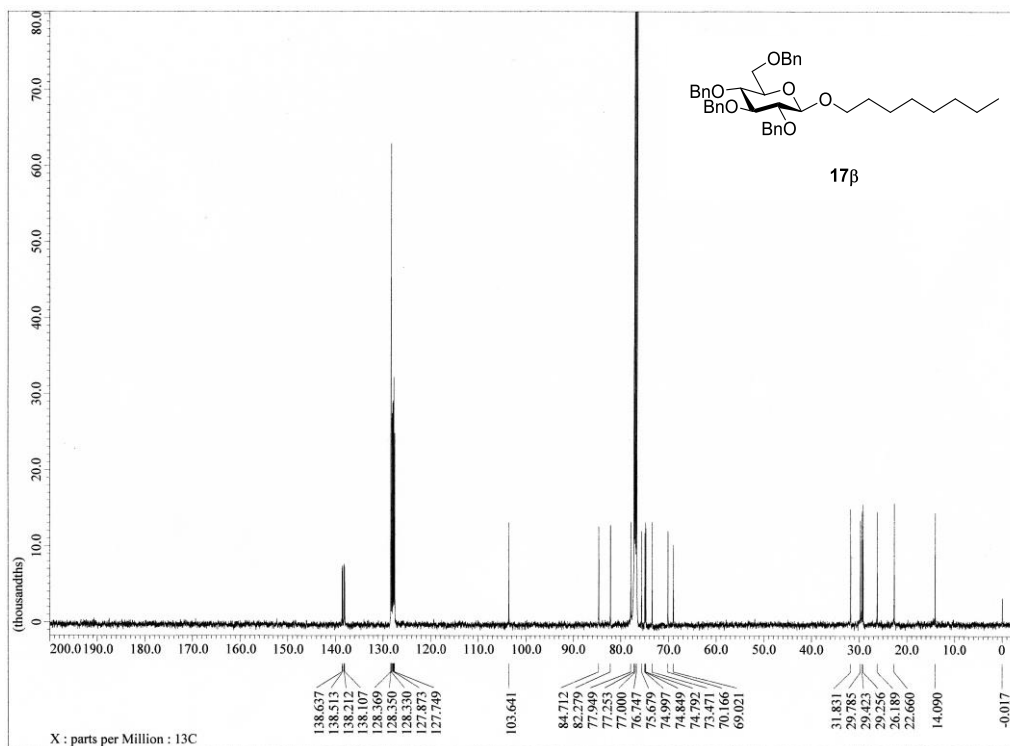

Figure S8  $^{13}\text{C}$  NMR spectrum of **17 $\beta$**



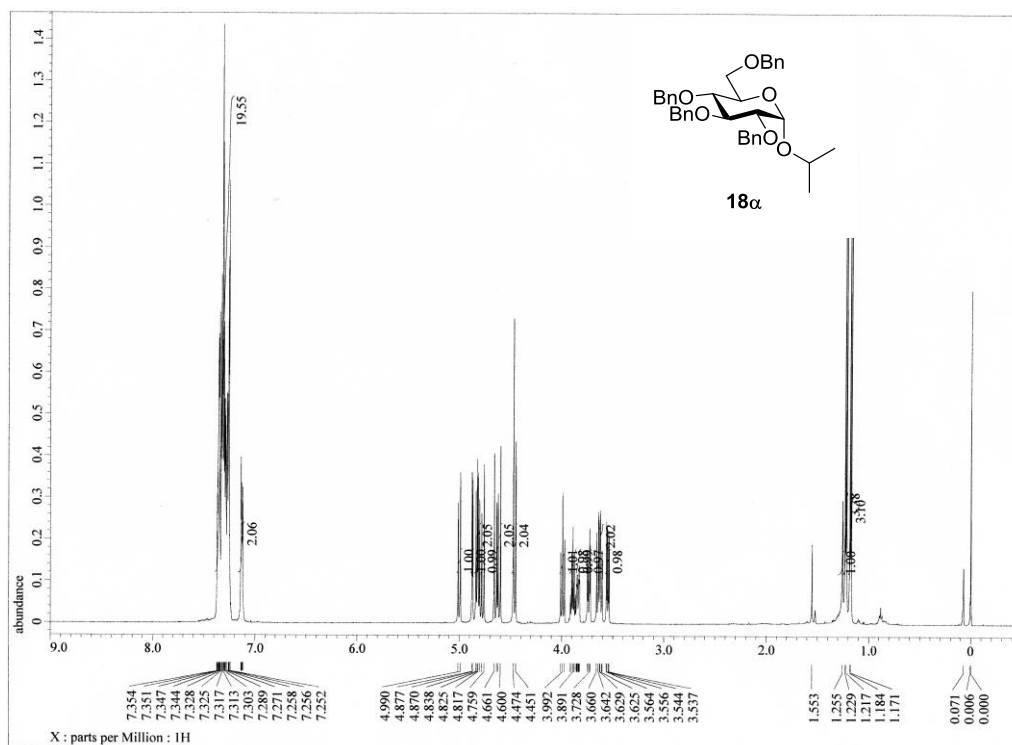

Figure S9 <sup>1</sup>H NMR spectrum of **18 $\alpha$**

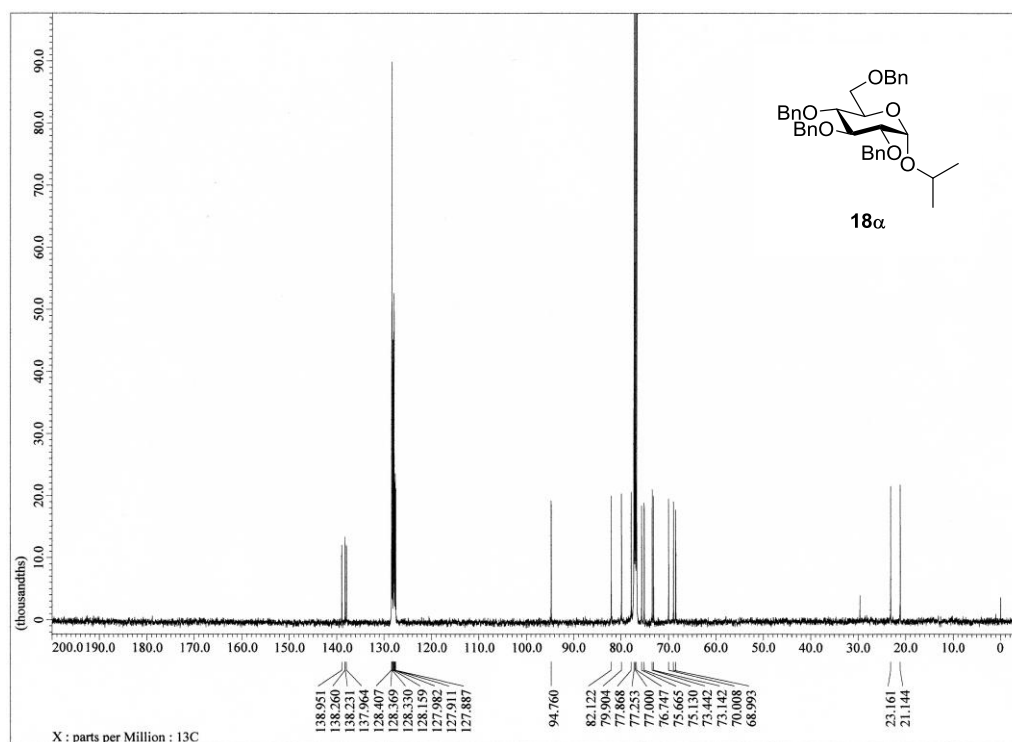

Figure S10 <sup>13</sup>C NMR spectrum of **18 $\alpha$**

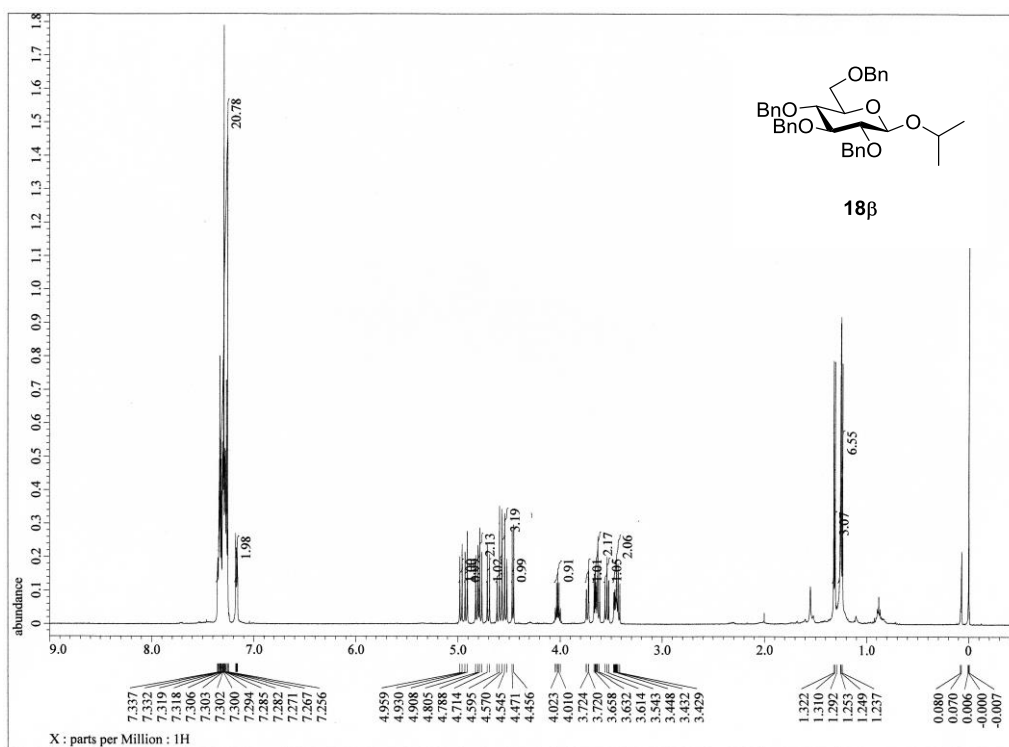

Figure S11 <sup>1</sup>H NMR spectrum of **18β**

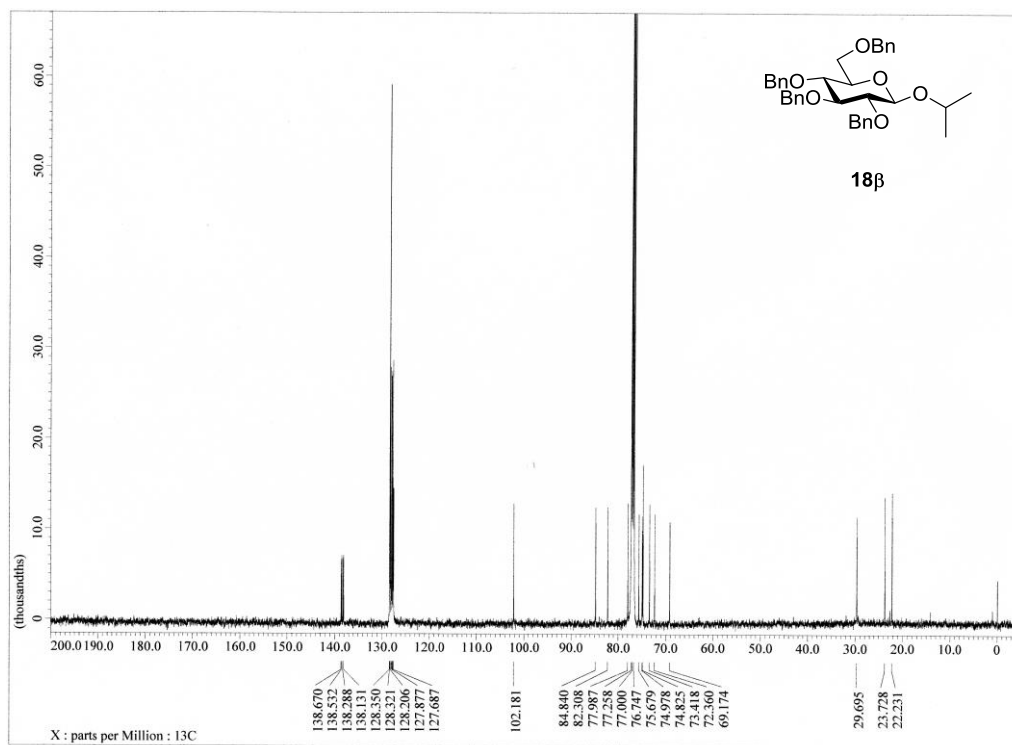

Figure S12 <sup>13</sup>C NMR spectrum of **18β**

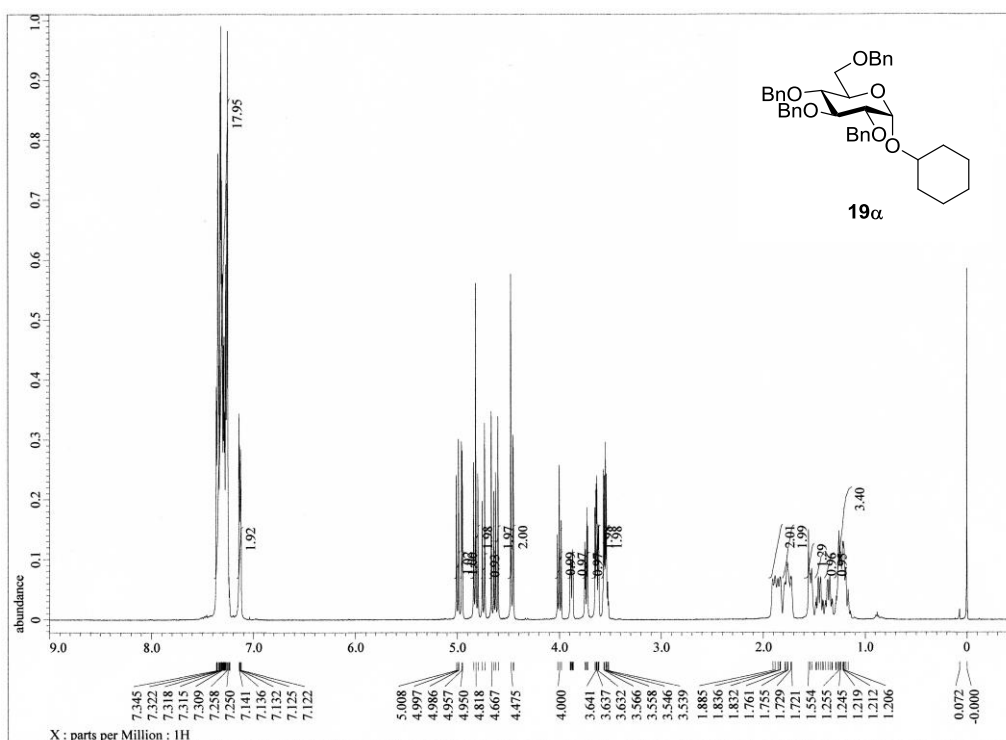

Figure S13  $^1\text{H}$  NMR spectrum of **19 $\alpha$**

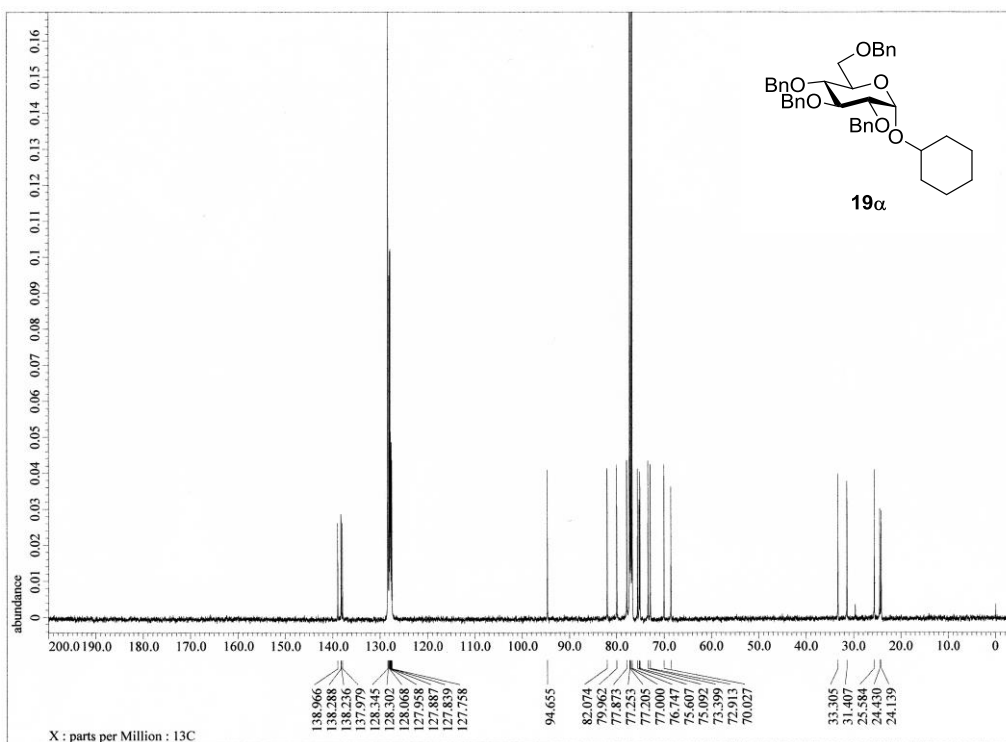

Figure S14  $^{13}\text{C}$  NMR spectrum of **19 $\alpha$**

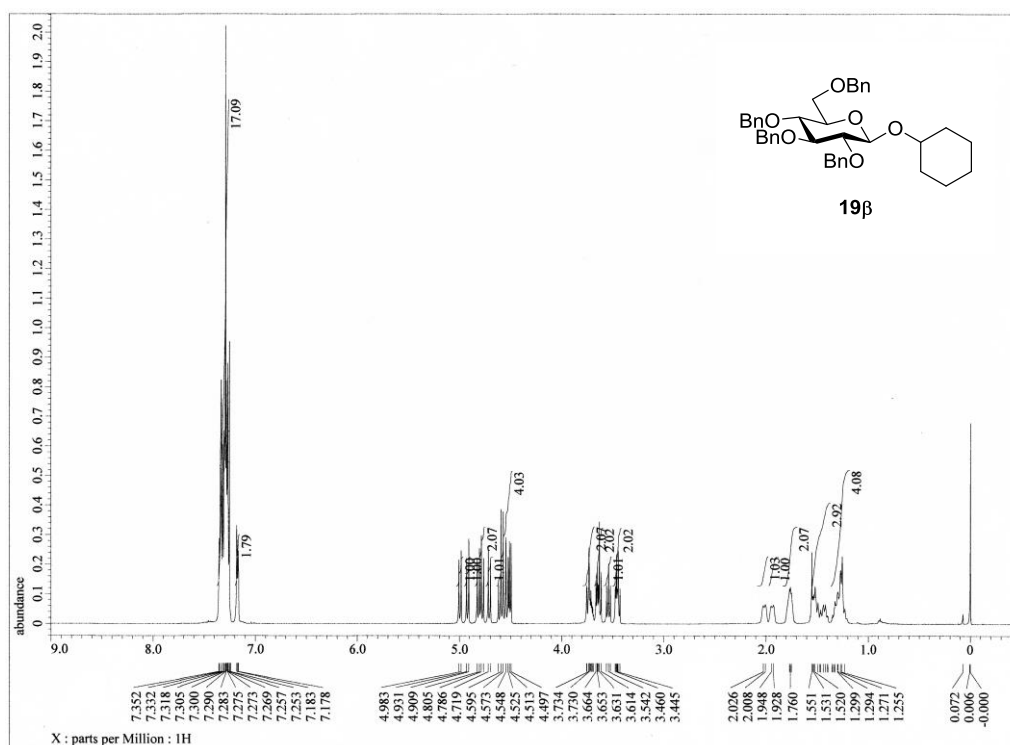

Figure S15 <sup>1</sup>H NMR spectrum of **19β**

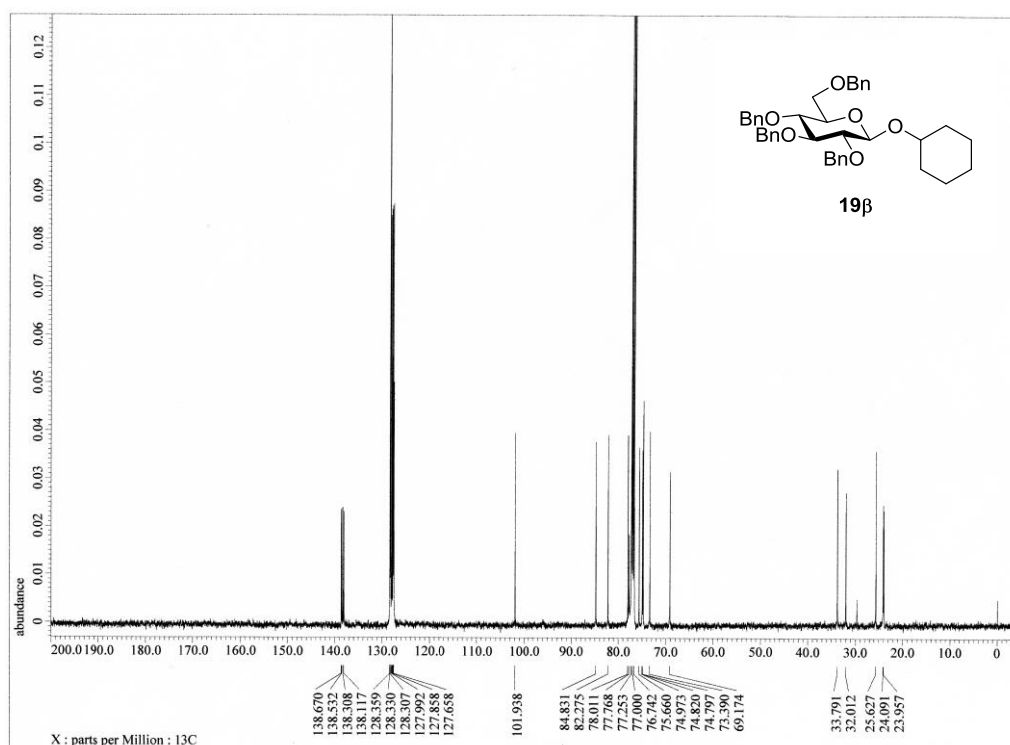

Figure S16 <sup>13</sup>C NMR spectrum of **19β**

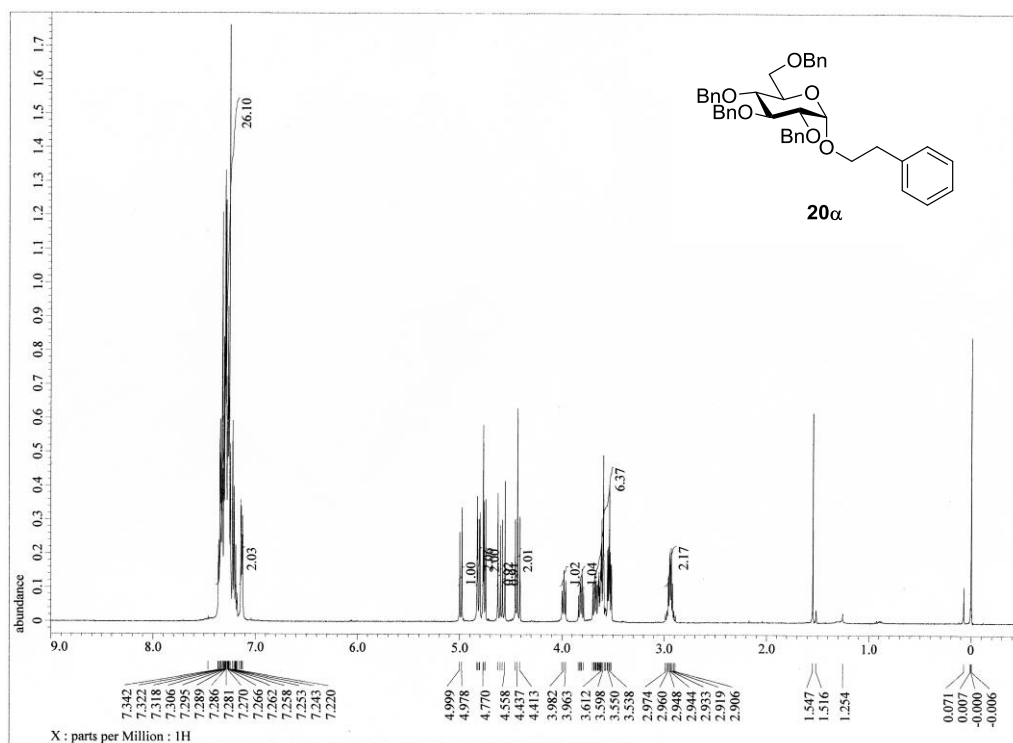

Figure S17 <sup>1</sup>H NMR spectrum of **20 $\alpha$**

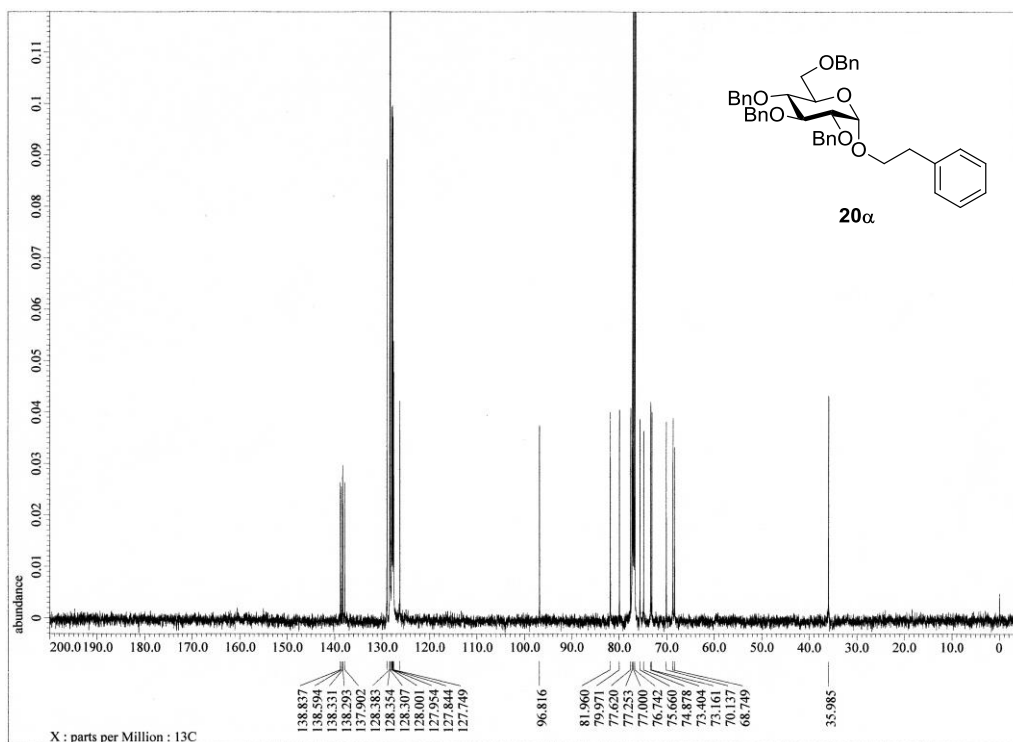

Figure S18 <sup>13</sup>C NMR spectrum of **20 $\alpha$**

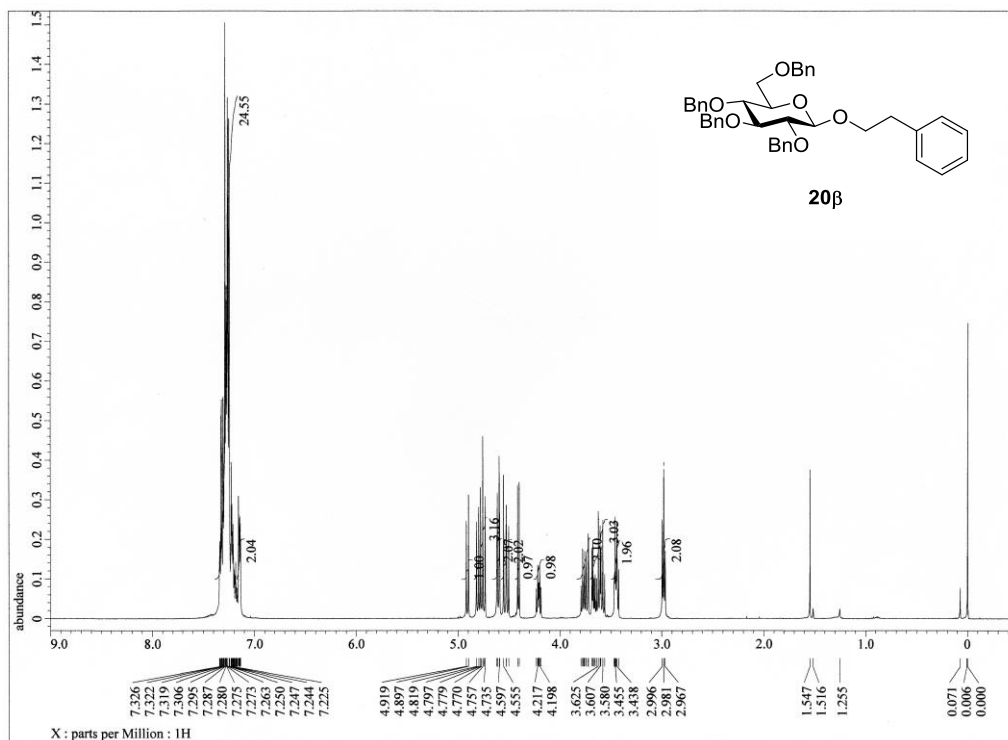

Figure S19 <sup>1</sup>H NMR spectrum of **20β**

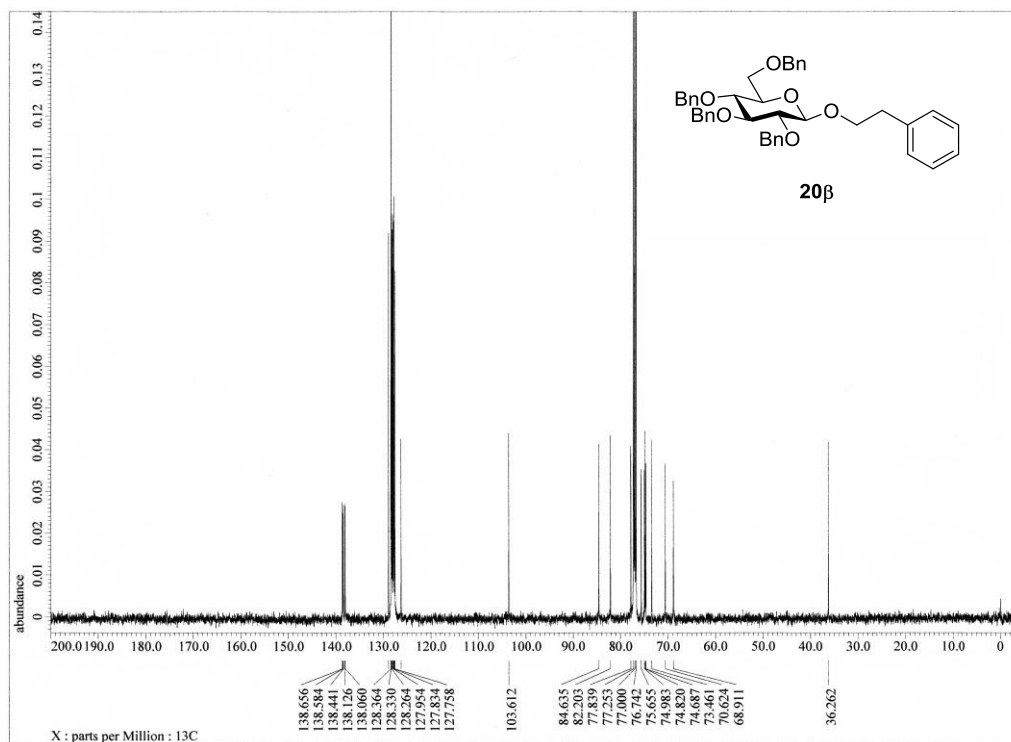

Figure S20 <sup>13</sup>C NMR spectrum of **20β**

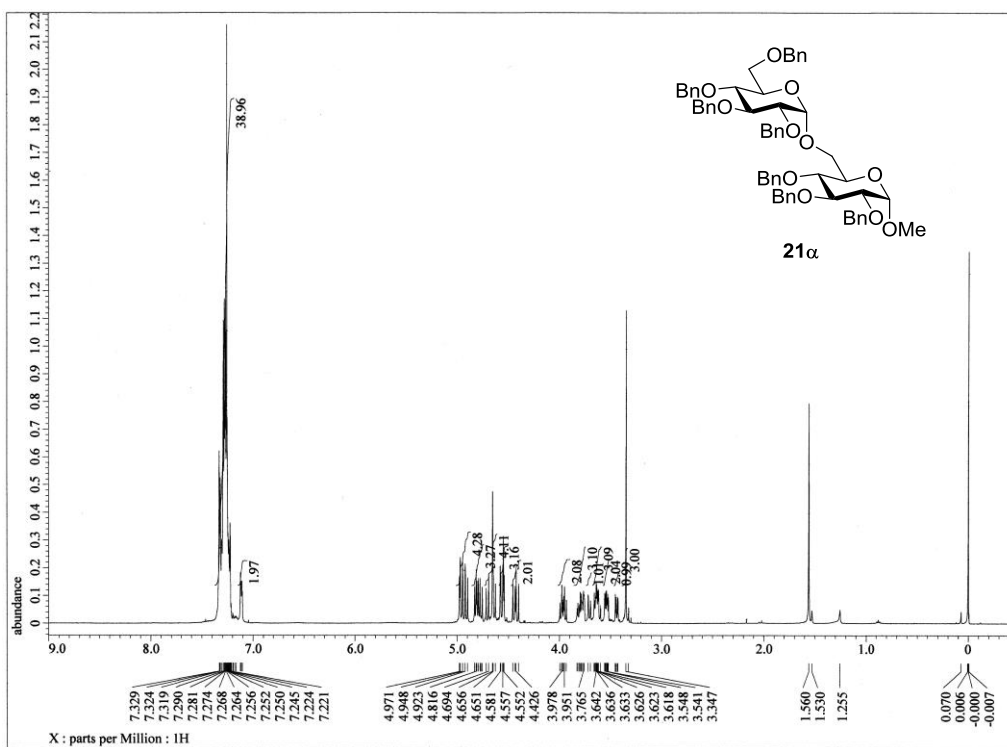

Figure S21 <sup>1</sup>H NMR spectrum of **21α**

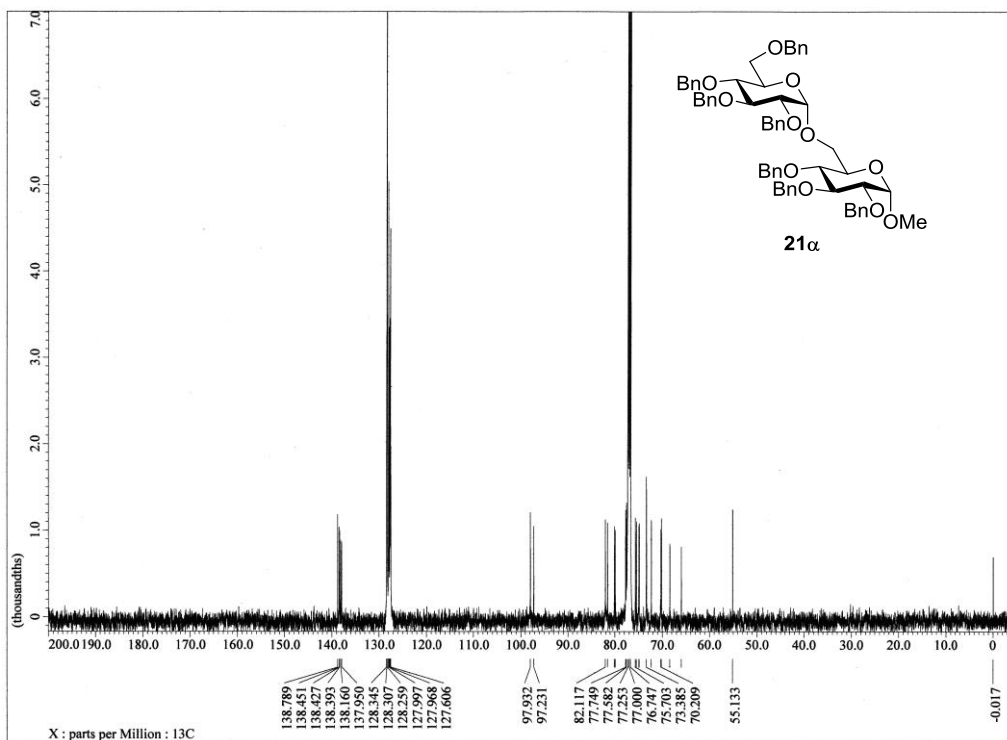

Figure S22 <sup>13</sup>C NMR spectrum of **21α**

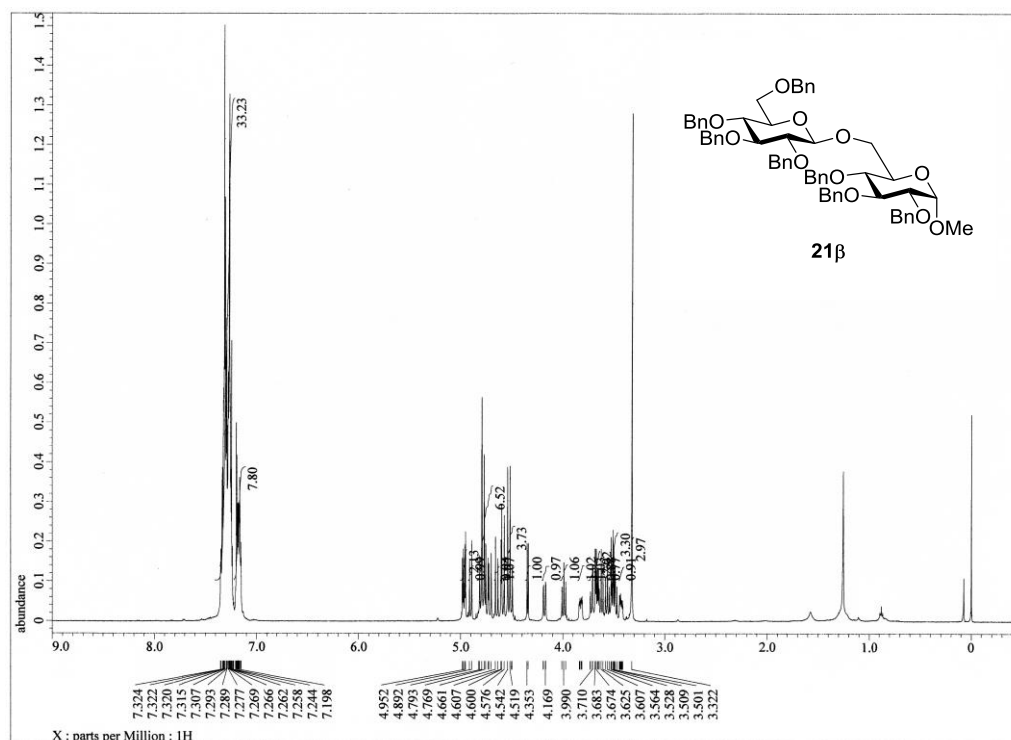

Figure S23  $^1\text{H}$  NMR spectrum of **21 $\beta$**

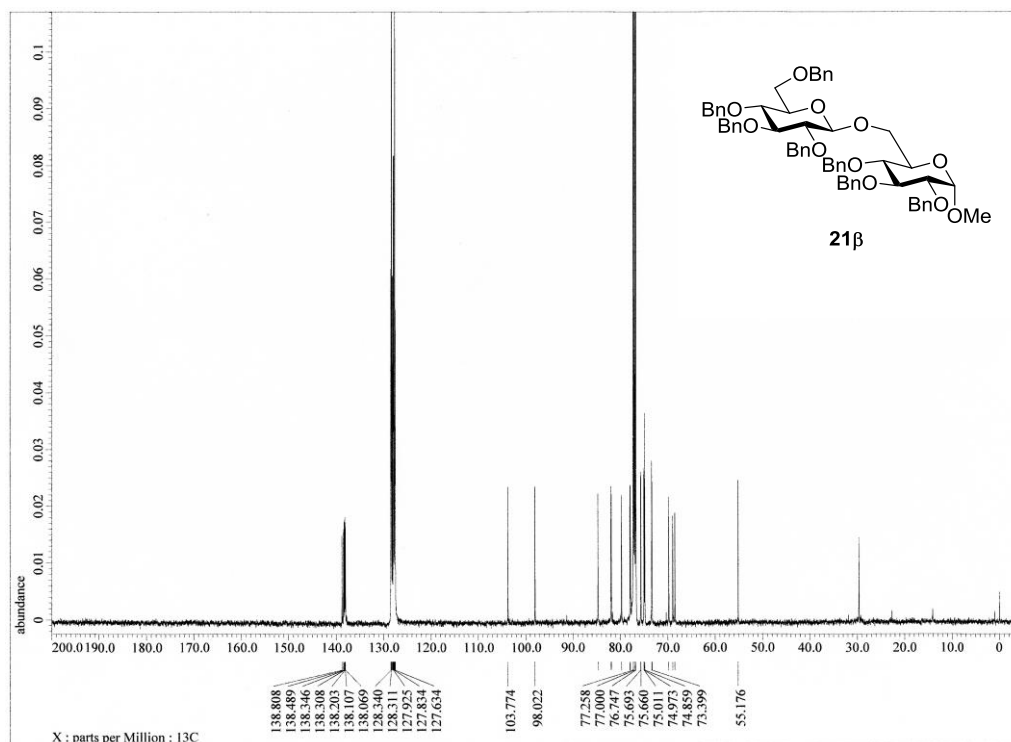

Figure S24  $^{13}\text{C}$  NMR spectrum of **21 $\beta$**



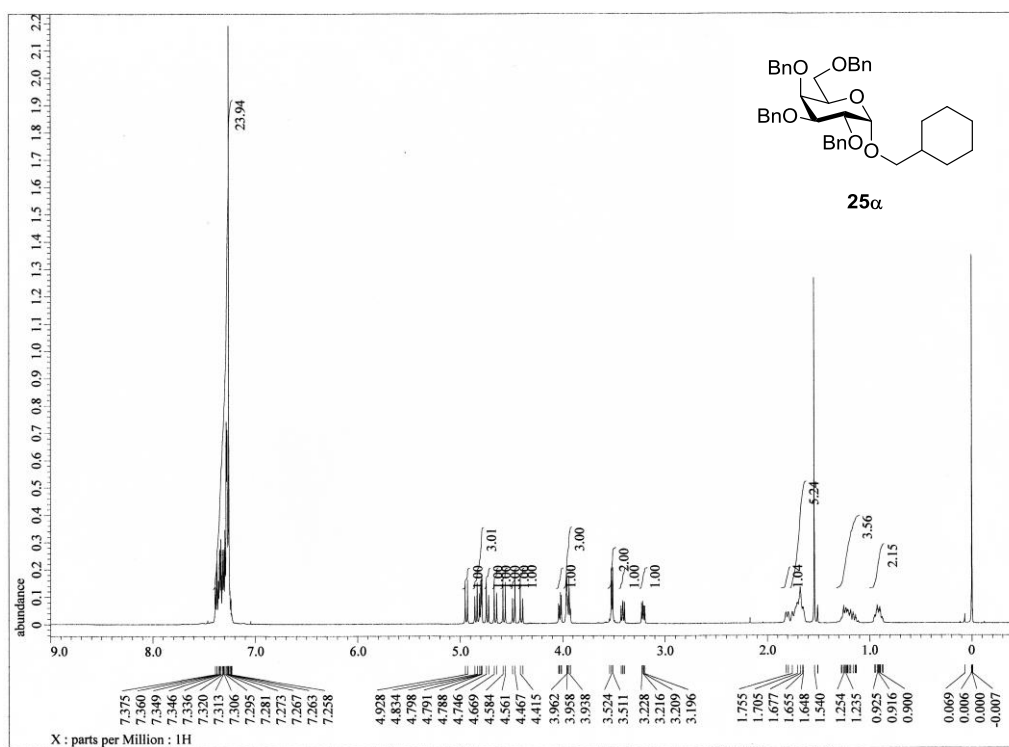

Figure S25  $^1\text{H}$  NMR spectrum of **25 $\alpha$**

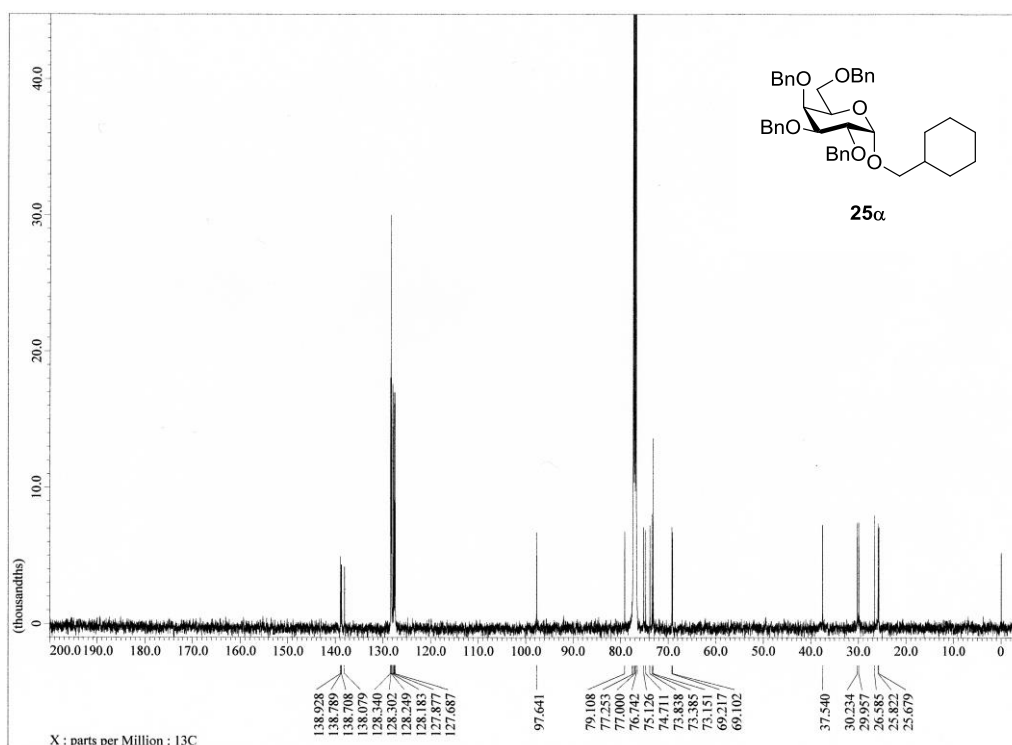

Figure S26  $^{13}\text{C}$  NMR spectrum of **25 $\alpha$**

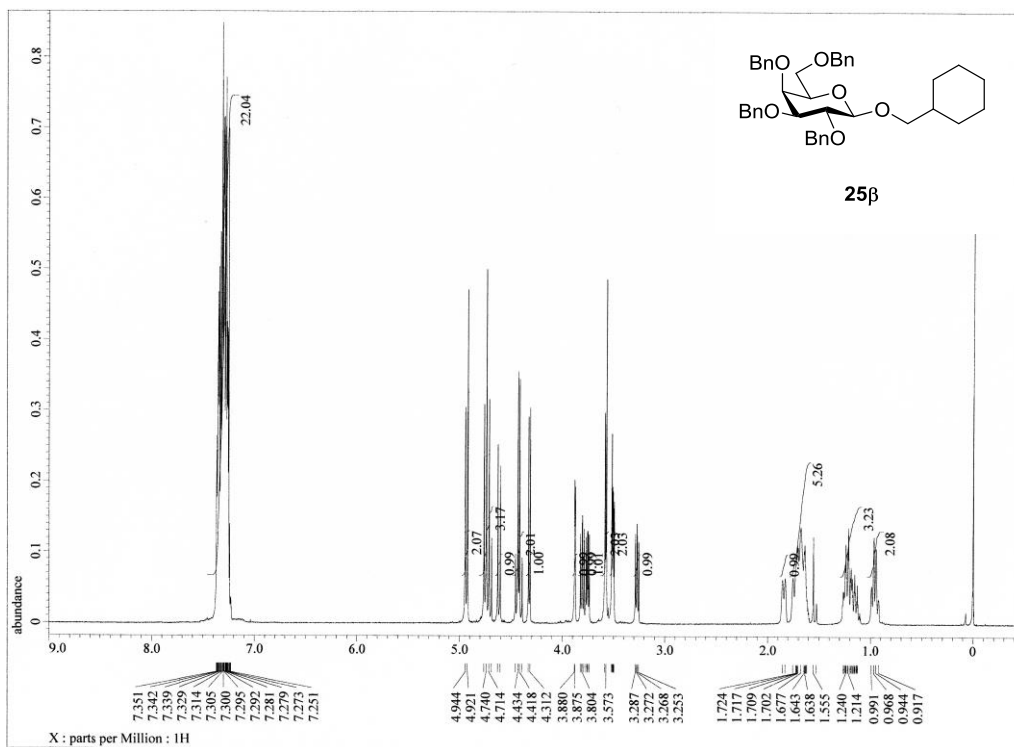

Figure S27  $^1\text{H}$  NMR spectrum of **25 $\beta$**

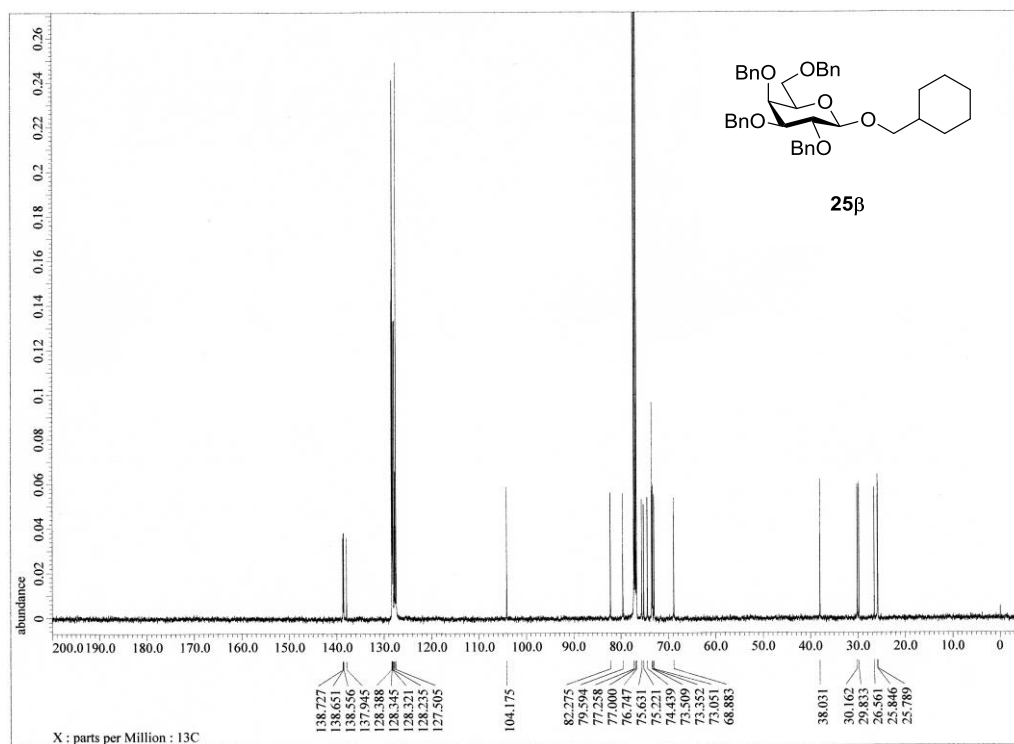

Figure S28  $^{13}\text{C}$  NMR spectrum of **25 $\beta$**

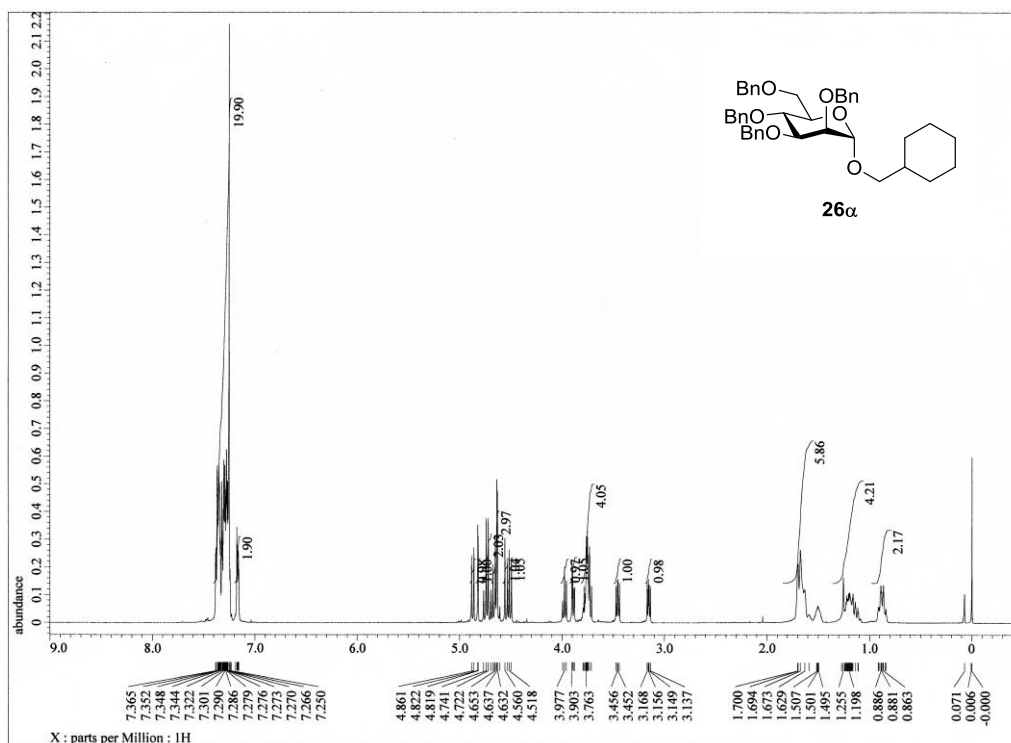

Figure S29 <sup>1</sup>H NMR spectrum of **26a**

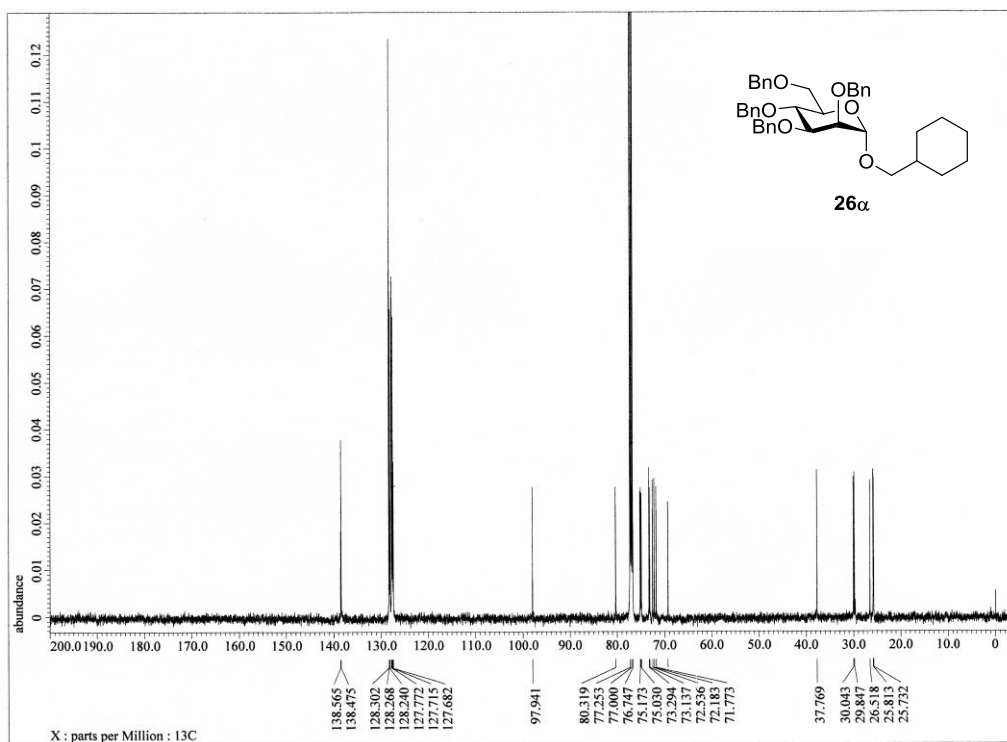

Figure S30 <sup>13</sup>C NMR spectrum of **26a**

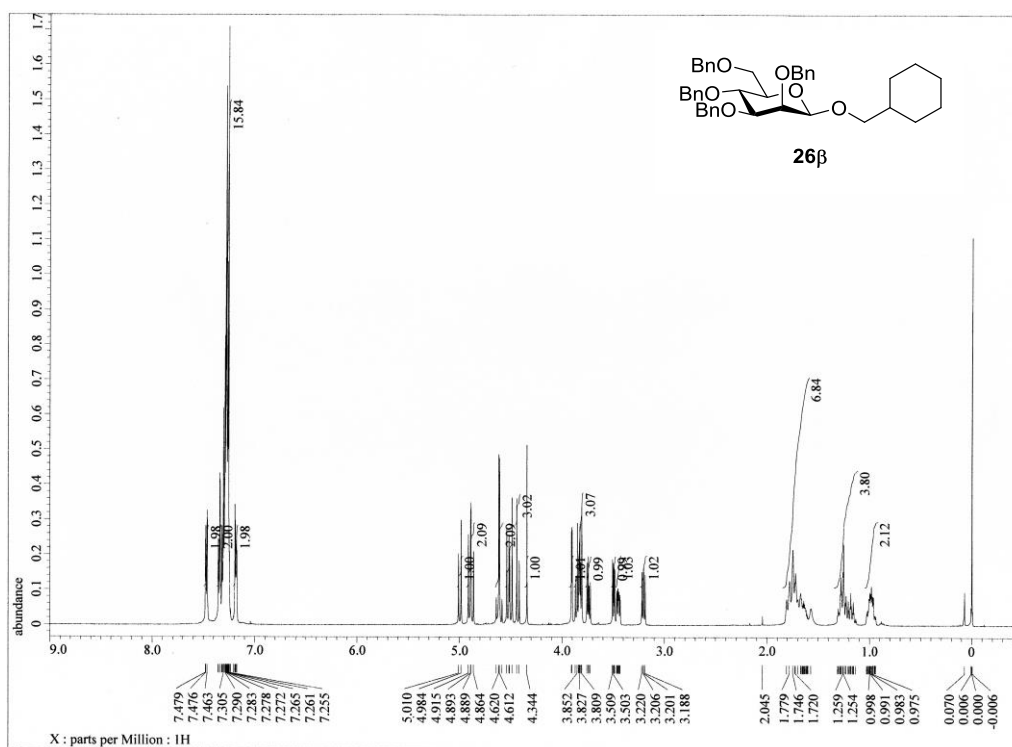

Figure S31 <sup>1</sup>H NMR spectrum of **26β**

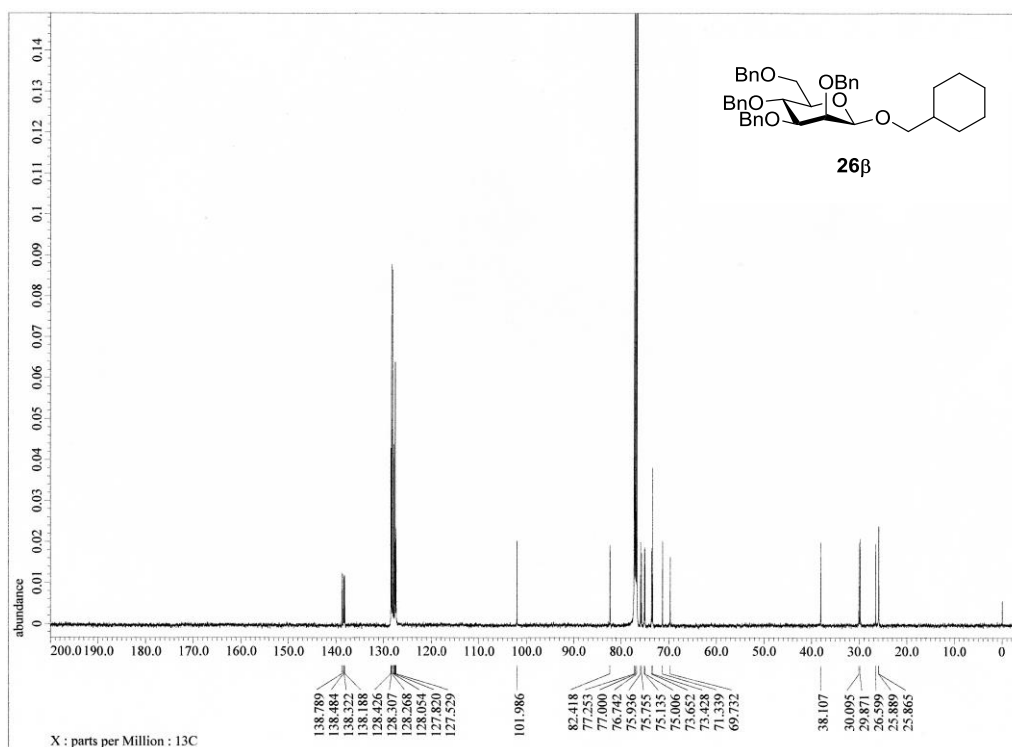

Figure S32 <sup>13</sup>C NMR spectrum of **26β**

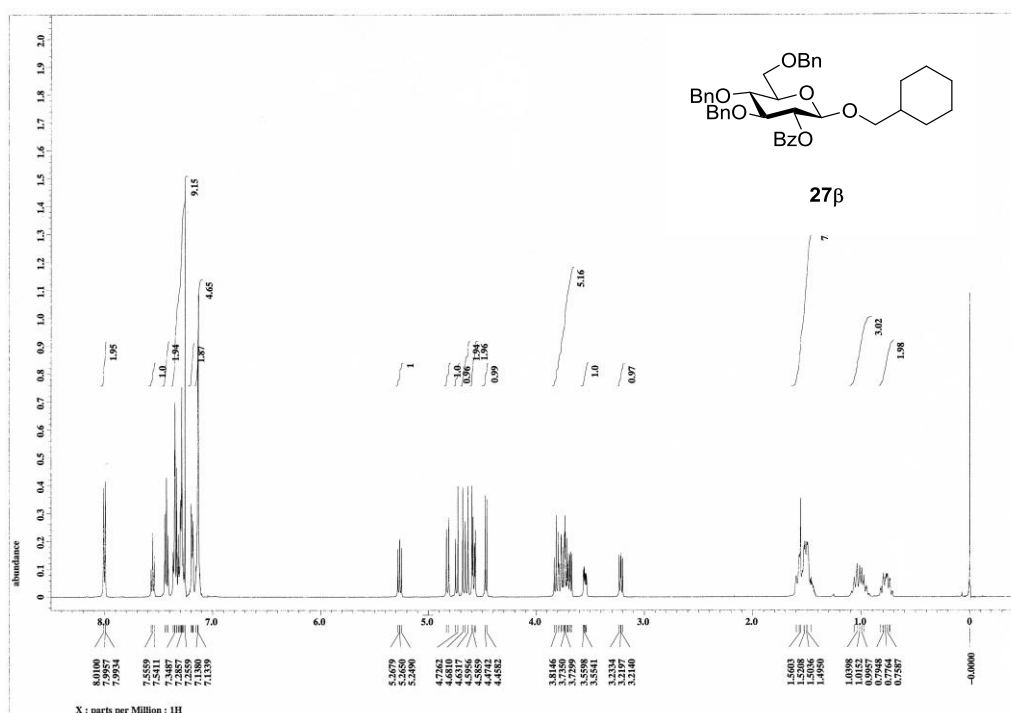

Figure S33 <sup>1</sup>H NMR spectrum of **27β**

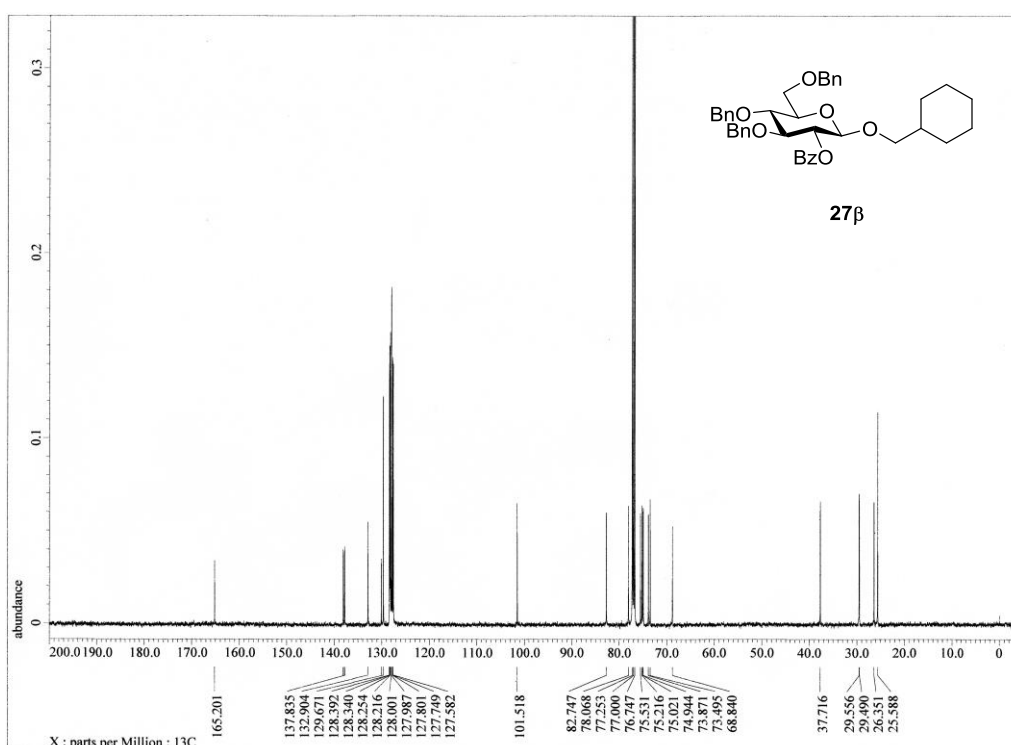

Figure S34 <sup>13</sup>C NMR spectrum of **27β**

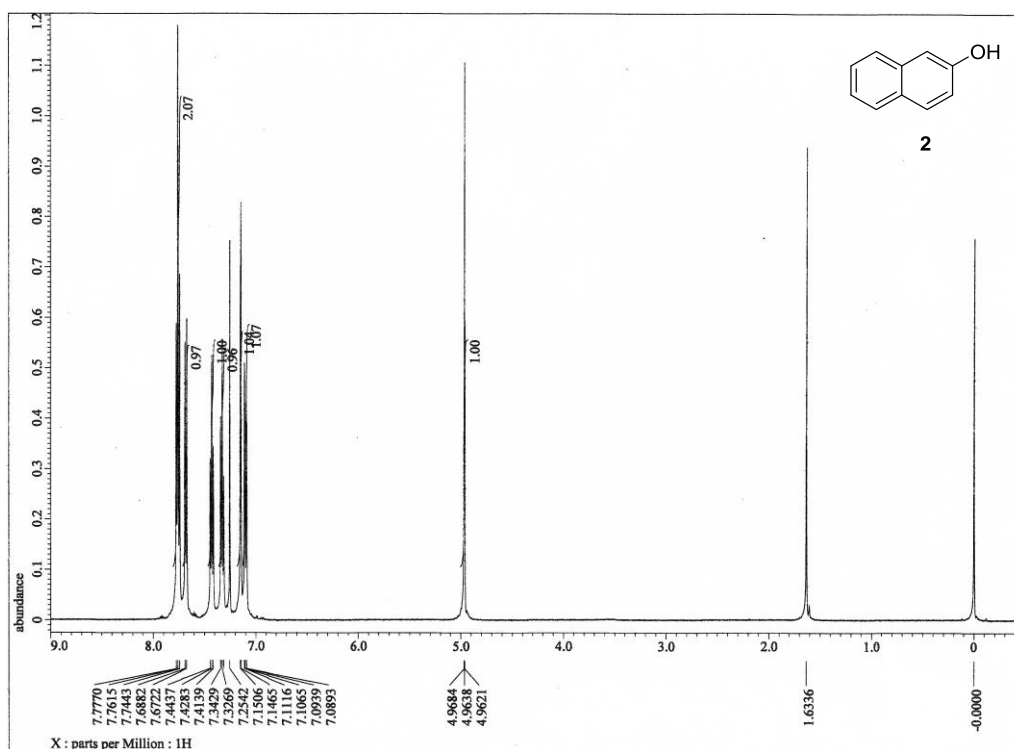

Figure S35 <sup>1</sup>H NMR spectrum of recovered **2** (500 MHz, CDCl<sub>3</sub>)

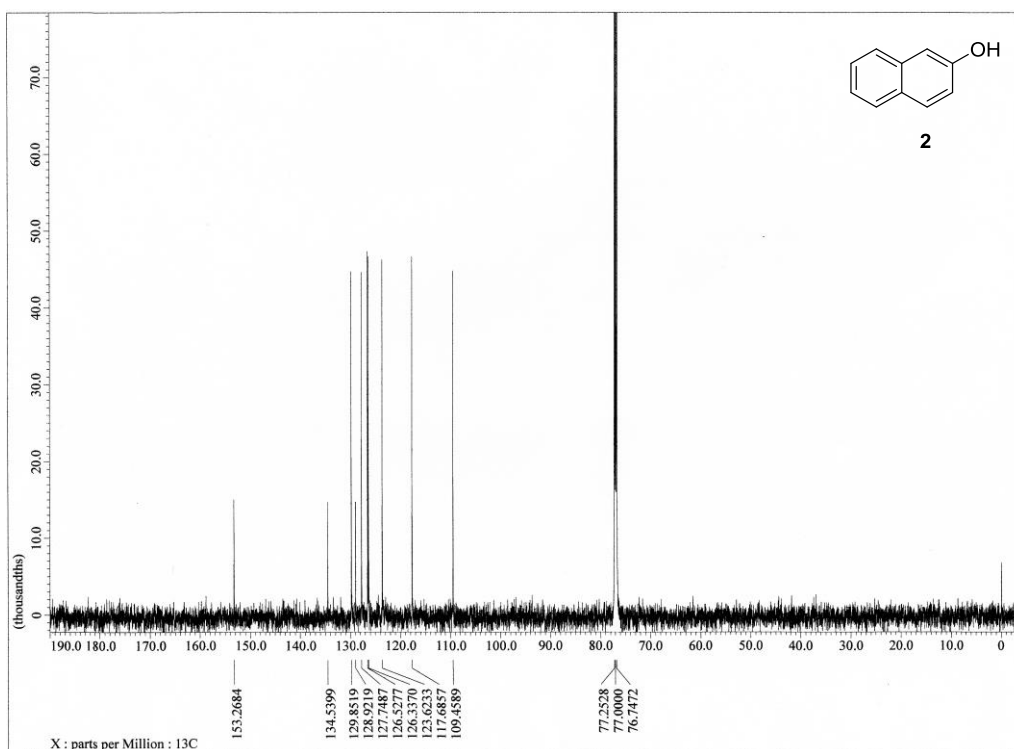

Figure S36 <sup>13</sup>C NMR spectrum of recovered **2** (500 MHz, CDCl<sub>3</sub>)

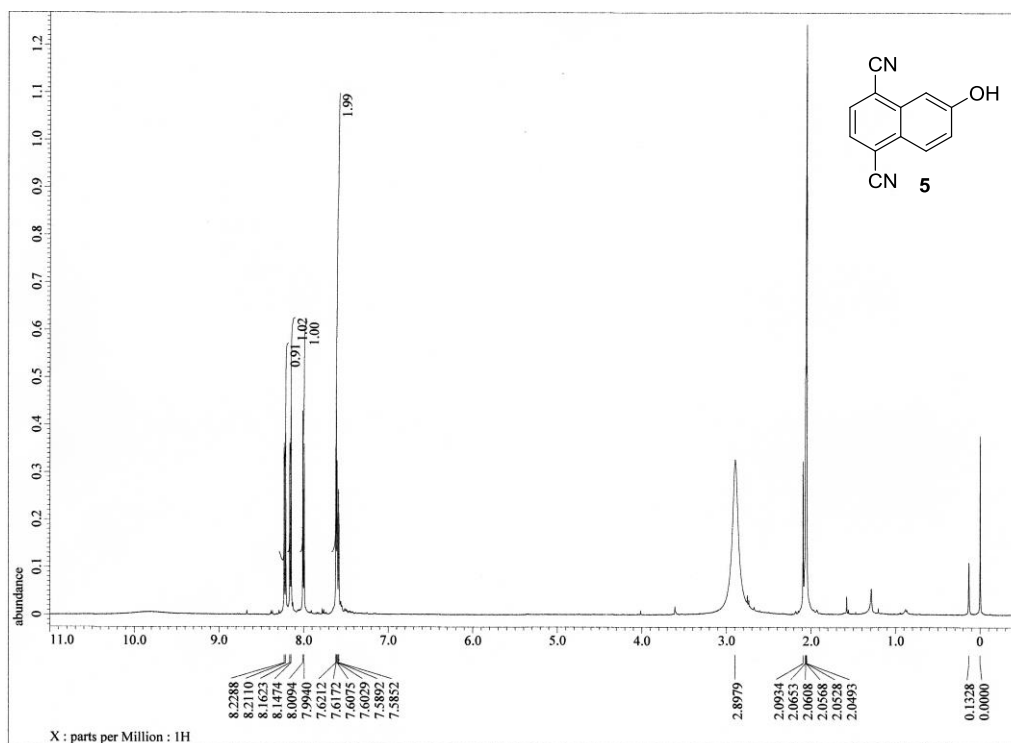

Figure S35 <sup>1</sup>H NMR spectrum of recovered **5** (500 MHz, acetone-*d*<sub>6</sub>)

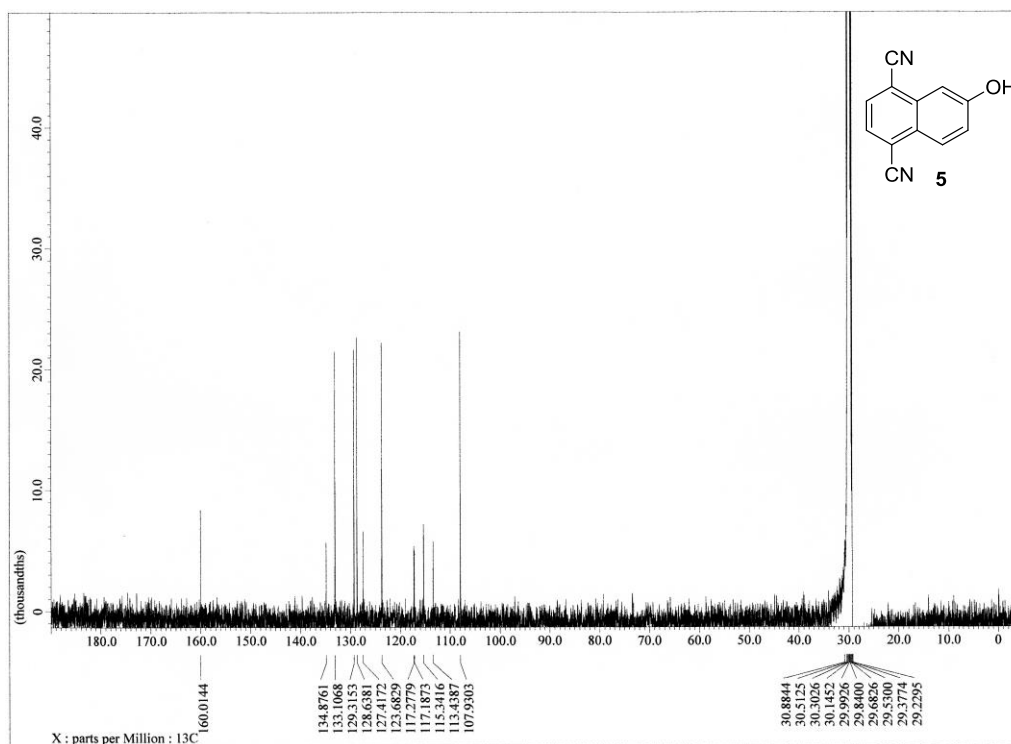

Figure S36 <sup>13</sup>C NMR spectrum of recovered **5** (500 MHz, acetone-*d*<sub>6</sub>)
